# Supplementary material for: DNA methylation atlas and machinery in the developing and regenerating annelid Platynereis dumerilii
Source: PubMed Central journal article supplement (PMC8330077; doi:10.1186/s12915-021-01074-5), 2021-08-03

9 dpa

11 dpa

13 dpa

20 dpa

25 dpa

**Class 1: low score at 25dpa**

(0 or 1 segment or self-amputation)

*Characteristics*

Bottleneck-like shape (Constriction)

No or small anal cirri

Posterior elongation is blocked

Possible self-amputation

*Proportion per Decitabine condition*

|             |       |         |
|-------------|-------|---------|
| 10 $\mu$ M  | 33.3% | } 30.6% |
| 50 $\mu$ M  | 37.5% |         |
| 100 $\mu$ M | 11.1% |         |

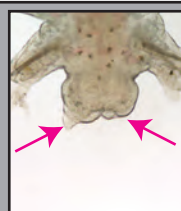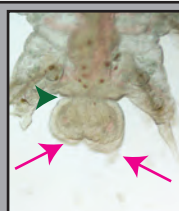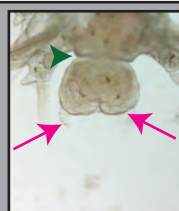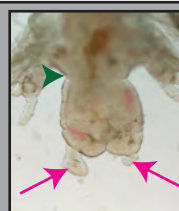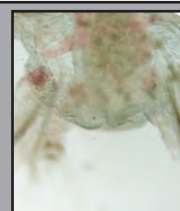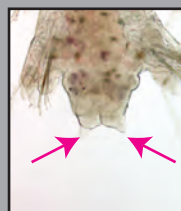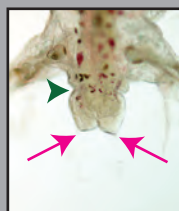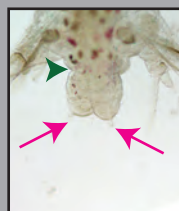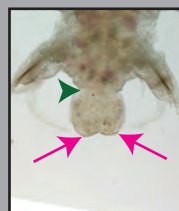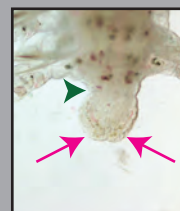**Class 2: intermediate score at 25dpa**

(2 to 10 segments)

*Characteristics*

Narrowed new structure (Shrinkage)

None to long anal cirri

Highly reduced posterior elongation

Parapods development impaired

*Proportion per Decitabine condition*

|             |       |         |
|-------------|-------|---------|
| 10 $\mu$ M  | 54.2% | } 61.6% |
| 50 $\mu$ M  | 62.5% |         |
| 100 $\mu$ M | 77.8% |         |

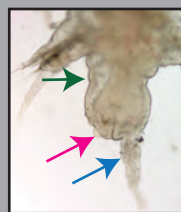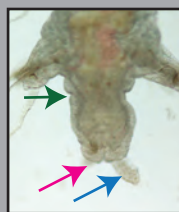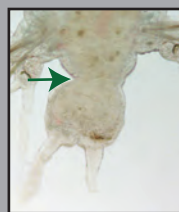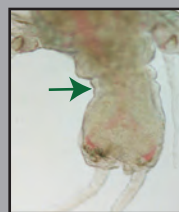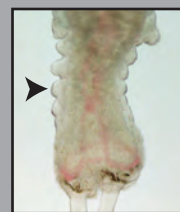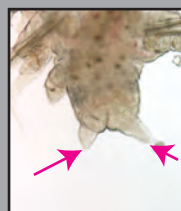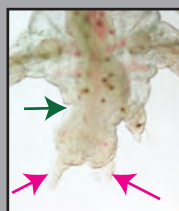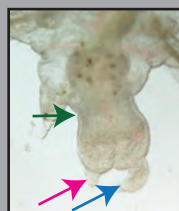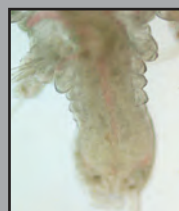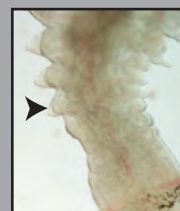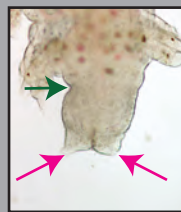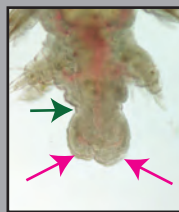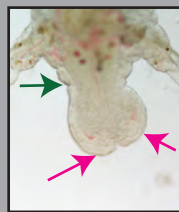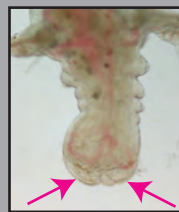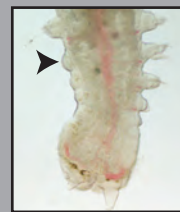**Class 3: control-like score at 25dpa**

(Above 10 segments)

*Characteristics*

Control-like shape

Anal cirri developed

Efficient posterior elongation

Proper parapod development

*Proportion per Decitabine condition*

|             |       |        |
|-------------|-------|--------|
| 10 $\mu$ M  | 12.5% | } 7.9% |
| 50 $\mu$ M  | 0%    |        |
| 100 $\mu$ M | 11.1% |        |

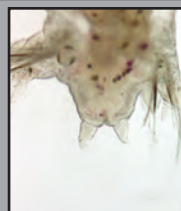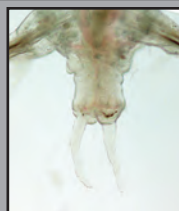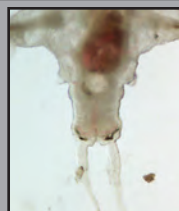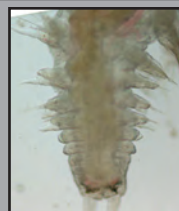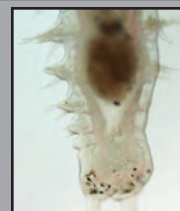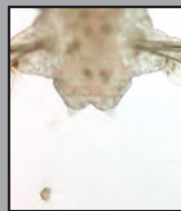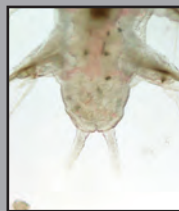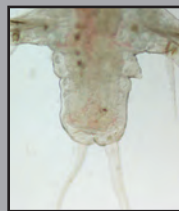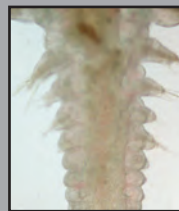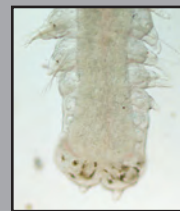

Supplement: 12915_2021_1074_MOESM14_ESM.pdf [file 12915_2021_1074_MOESM14_ESM.pdf]
