# Supplementary material for: DNA methylation atlas and machinery in the developing and regenerating annelid Platynereis dumerilii
Source: PubMed Central journal article supplement (PMC8330077; doi:10.1186/s12915-021-01074-5), 2021-08-03

**A****DNA methylation and demethylation**

MODIFIERS

WRITERS

READERS

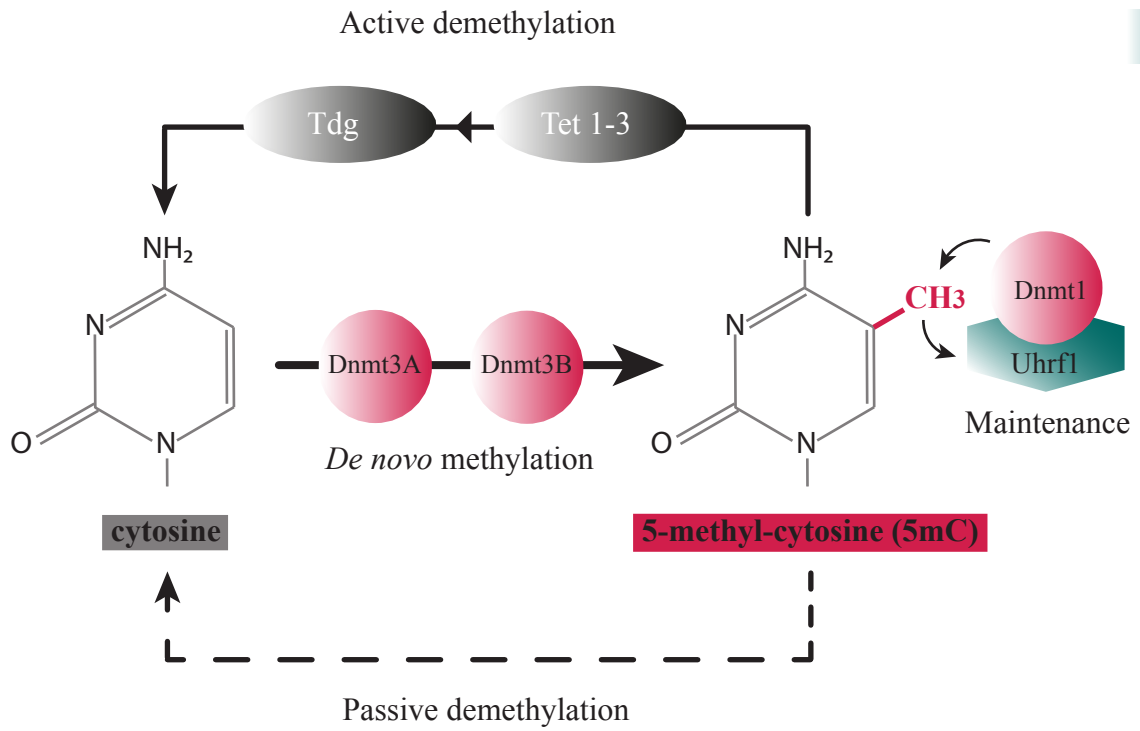**B****NuRD complex**Transcription  
ON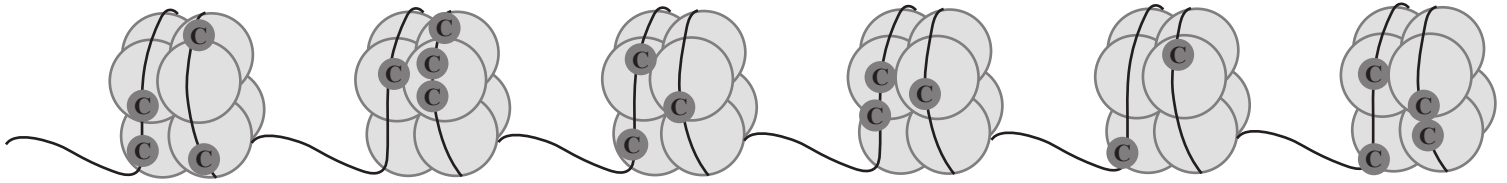

DNA methylation &amp; NuRD complex recruitment

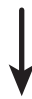Transcription  
OFF

● cytosine

● 5-methyl-cytosine

READERS

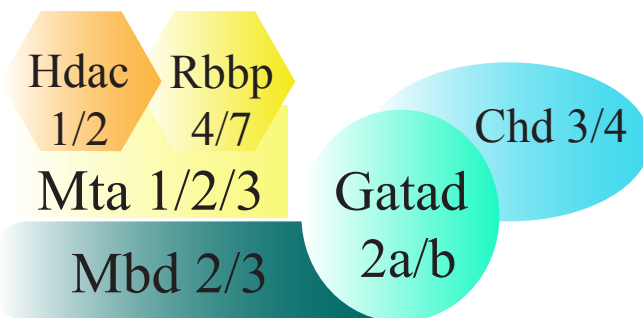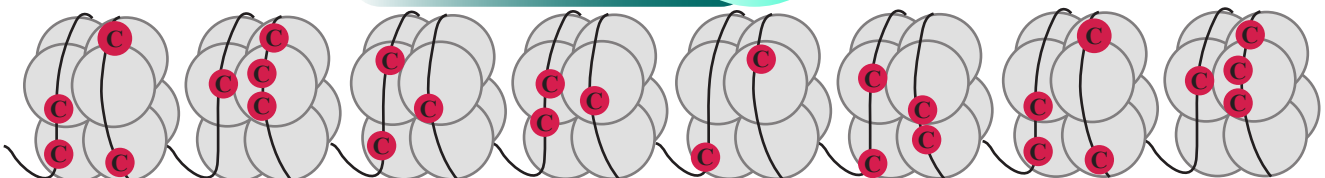

Supplement: 12915_2021_1074_MOESM1_ESM.pdf [file 12915_2021_1074_MOESM1_ESM.pdf]
