# Supplementary material for: DNA methylation atlas and machinery in the developing and regenerating annelid Platynereis dumerilii
Source: PubMed Central journal article supplement (PMC8330077; doi:10.1186/s12915-021-01074-5), 2021-08-03
Supplement: 12915_2021_1074_MOESM3_ESM.pdf [file 12915_2021_1074_MOESM3_ESM.pdf]

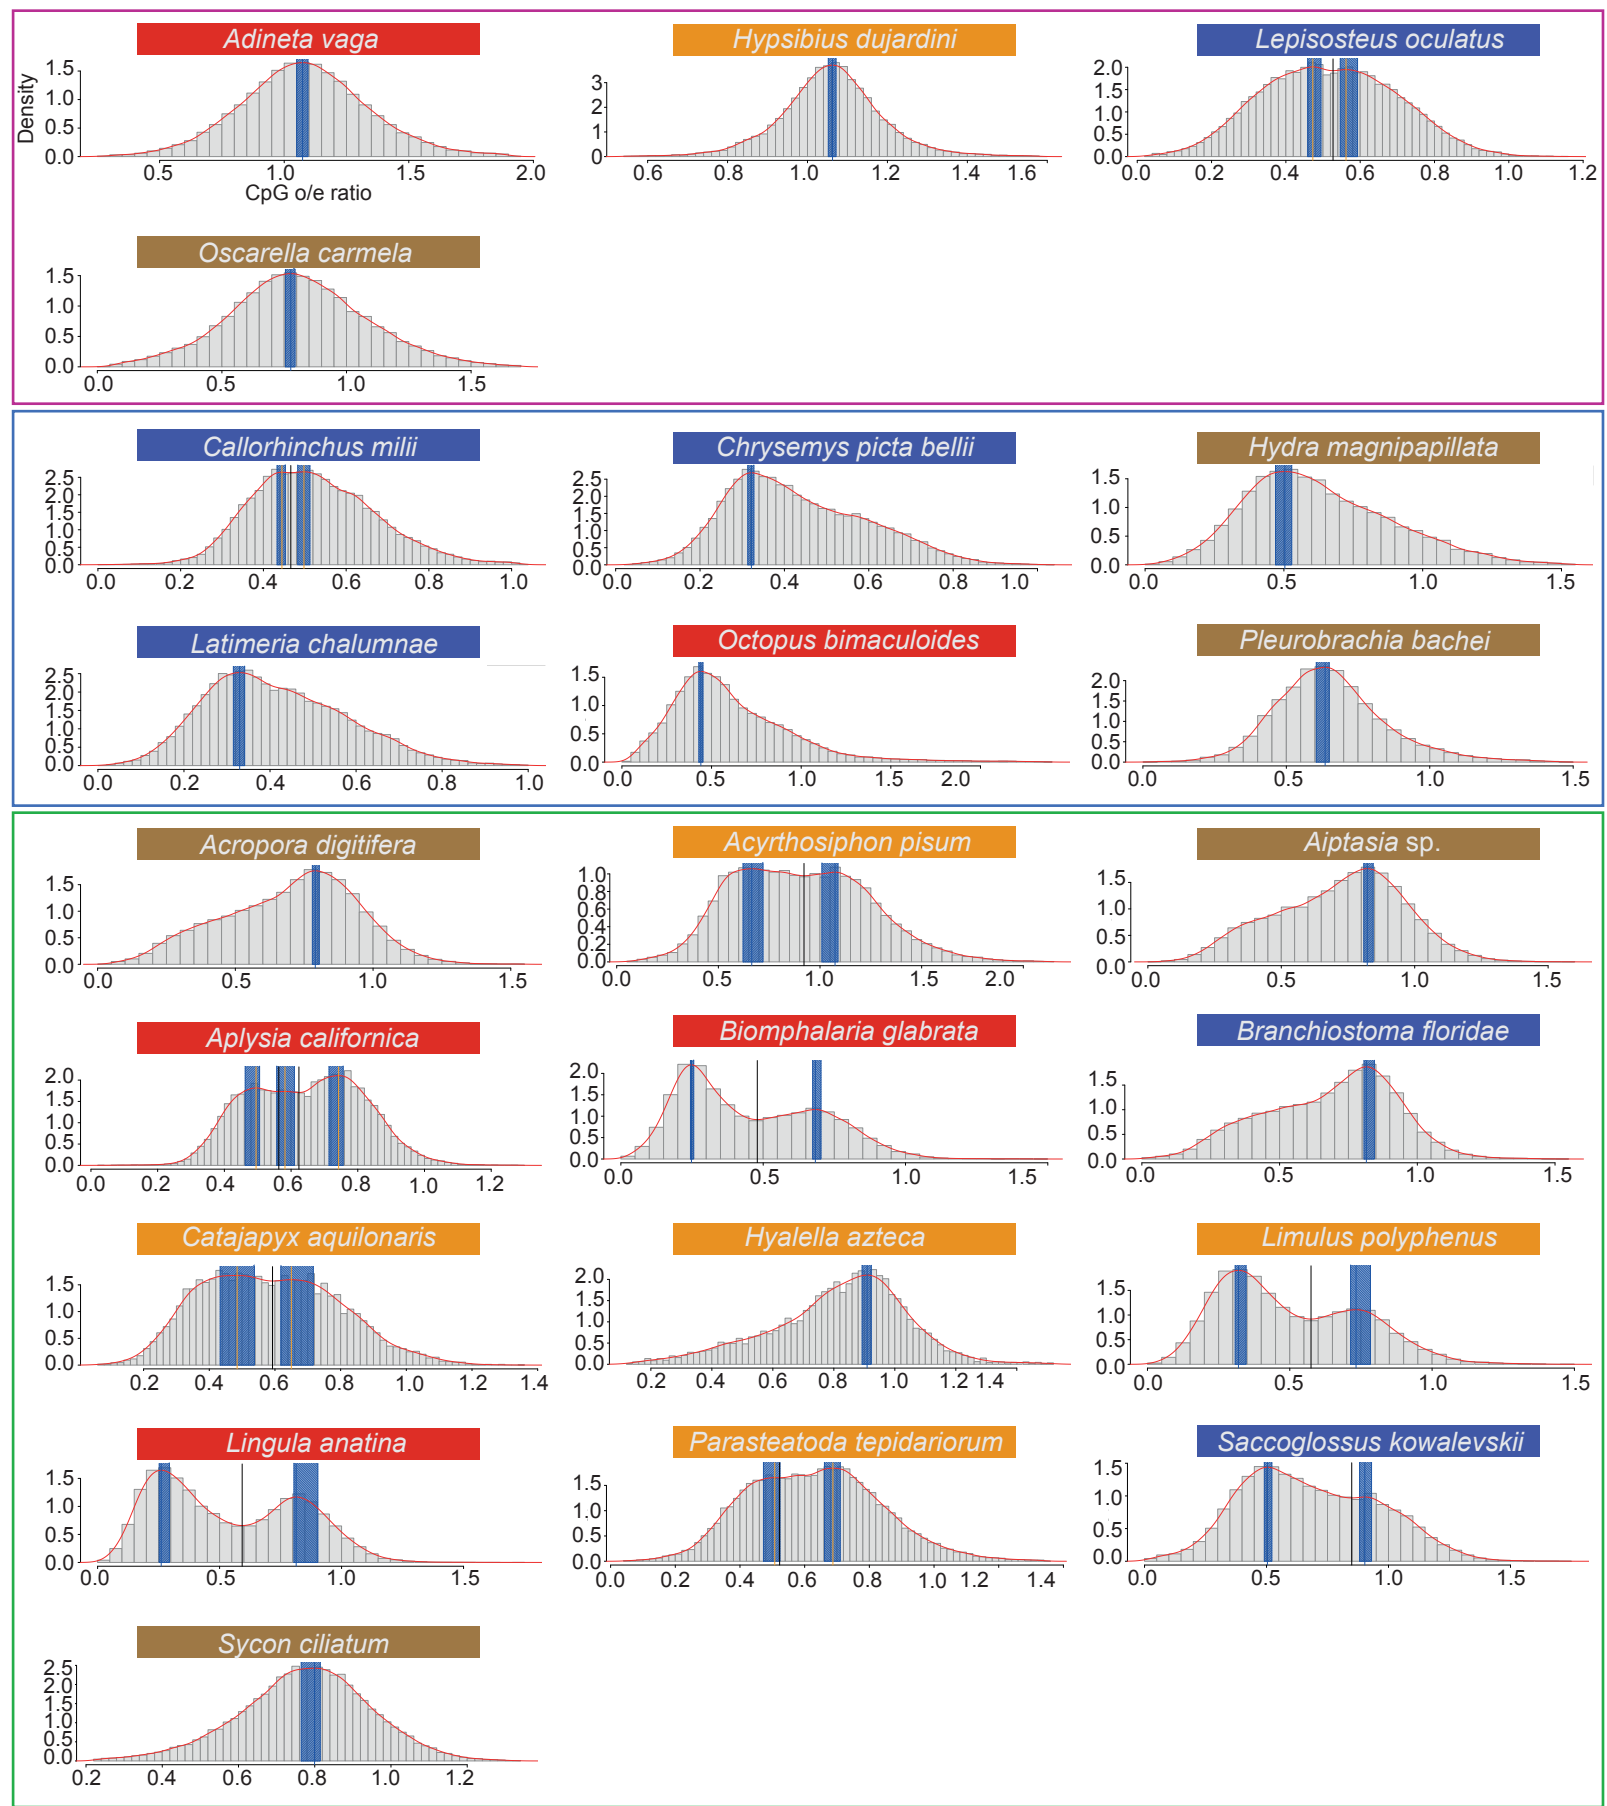

### CpG o/e Clusters

- Cluster 2
- Cluster 3
- Cluster 4

### Metazoan groups

- Non-bilaterians
- Ecdyzoans
- Deuterostomes
- Lophotrochozoans

### Graphic legends

- Estimated density
- Mode with  $PM \geq 0.1$
- Mode with  $0.05 \leq PM < 0.1$
