# Supplementary material for: DNA methylation atlas and machinery in the developing and regenerating annelid Platynereis dumerilii
Source: PubMed Central journal article supplement (PMC8330077; doi:10.1186/s12915-021-01074-5), 2021-08-03
Supplement: 12915_2021_1074_MOESM4_ESM.pdf [file 12915_2021_1074_MOESM4_ESM.pdf]

| Families | Protein | Identification in <i>P. durus/villi</i><br>(PubMeds)                                                                                                                                                                                                                                                                                                                                                                                                                                                                                                                                                                                                                                                                                                                                                                                                                                                                                                                                                                                                                                                                                                                                                                                                                                                                                                                                                                                                                                                                                                                                                                                                                                                                                                                                                                                                                                                                                                                                                                                                                                                                                                                                                                                                                                                                                                                                                                                                                                                                                                                                                                                                                                                                                                                                                                                                                                                                                                                                                                                                                                                                                                                                                                                                                                                                                                                                                                                                                                                                                                                                                                                                                                                                                                                                                                                                                                                                                                                                                                                                                                                                                                                                                                                                                                                                                                                                                                                                                                                                                                                                                                                                                                                                                                                                                                                                                                                                                                                                                                                                                                                                                                                                                                                                                                                                                                                                                                                                                                                                                                                                                                                                                                                                                                                                                                                                                                                                                                                                                                                                                                                                                                                                                                                                                                                                                                                                                                                                                                                                                                                                                                                                                                                                                                                                                                                                                                                                                                                                                                                                                                                                                                                                                                                                                                                                                                                                                                                                                                                                                                                                                                                                                                                                                                                                                                                                                                                                                                                                                                                                                                                                                                                                                                                                                                                                                                                                                                                                                                                                                                                                                                                                                                                                                                                                                                                                                                                                                                                                                                                                                                                                                                                                                                                                                                                                                                               |
|----------|---------|--------------------------------------------------------------------------------------------------------------------------------------------------------------------------------------------------------------------------------------------------------------------------------------------------------------------------------------------------------------------------------------------------------------------------------------------------------------------------------------------------------------------------------------------------------------------------------------------------------------------------------------------------------------------------------------------------------------------------------------------------------------------------------------------------------------------------------------------------------------------------------------------------------------------------------------------------------------------------------------------------------------------------------------------------------------------------------------------------------------------------------------------------------------------------------------------------------------------------------------------------------------------------------------------------------------------------------------------------------------------------------------------------------------------------------------------------------------------------------------------------------------------------------------------------------------------------------------------------------------------------------------------------------------------------------------------------------------------------------------------------------------------------------------------------------------------------------------------------------------------------------------------------------------------------------------------------------------------------------------------------------------------------------------------------------------------------------------------------------------------------------------------------------------------------------------------------------------------------------------------------------------------------------------------------------------------------------------------------------------------------------------------------------------------------------------------------------------------------------------------------------------------------------------------------------------------------------------------------------------------------------------------------------------------------------------------------------------------------------------------------------------------------------------------------------------------------------------------------------------------------------------------------------------------------------------------------------------------------------------------------------------------------------------------------------------------------------------------------------------------------------------------------------------------------------------------------------------------------------------------------------------------------------------------------------------------------------------------------------------------------------------------------------------------------------------------------------------------------------------------------------------------------------------------------------------------------------------------------------------------------------------------------------------------------------------------------------------------------------------------------------------------------------------------------------------------------------------------------------------------------------------------------------------------------------------------------------------------------------------------------------------------------------------------------------------------------------------------------------------------------------------------------------------------------------------------------------------------------------------------------------------------------------------------------------------------------------------------------------------------------------------------------------------------------------------------------------------------------------------------------------------------------------------------------------------------------------------------------------------------------------------------------------------------------------------------------------------------------------------------------------------------------------------------------------------------------------------------------------------------------------------------------------------------------------------------------------------------------------------------------------------------------------------------------------------------------------------------------------------------------------------------------------------------------------------------------------------------------------------------------------------------------------------------------------------------------------------------------------------------------------------------------------------------------------------------------------------------------------------------------------------------------------------------------------------------------------------------------------------------------------------------------------------------------------------------------------------------------------------------------------------------------------------------------------------------------------------------------------------------------------------------------------------------------------------------------------------------------------------------------------------------------------------------------------------------------------------------------------------------------------------------------------------------------------------------------------------------------------------------------------------------------------------------------------------------------------------------------------------------------------------------------------------------------------------------------------------------------------------------------------------------------------------------------------------------------------------------------------------------------------------------------------------------------------------------------------------------------------------------------------------------------------------------------------------------------------------------------------------------------------------------------------------------------------------------------------------------------------------------------------------------------------------------------------------------------------------------------------------------------------------------------------------------------------------------------------------------------------------------------------------------------------------------------------------------------------------------------------------------------------------------------------------------------------------------------------------------------------------------------------------------------------------------------------------------------------------------------------------------------------------------------------------------------------------------------------------------------------------------------------------------------------------------------------------------------------------------------------------------------------------------------------------------------------------------------------------------------------------------------------------------------------------------------------------------------------------------------------------------------------------------------------------------------------------------------------------------------------------------------------------------------------------------------------------------------------------------------------------------------------------------------------------------------------------------------------------------------------------------------------------------------------------------------------------------------------------------------------------------------------------------------------------------------------------------------------------------------------------------------------------------------------------------------------------------------------------------------------------------------------------------------------------------------------------------------------------------------------------------------------------------------------------------------------------------------------------------------------------------------------------------------------------------------------------------------------------------------------------------------------------------------------------------------------------------------------------------------------------------|
| DNMT     | DNMT1   | comp223422_c0<br>Hsnp DNMT1<br>118-22<br>414-420<br>439-440<br>450-454<br>467-469<br>480-482<br>498-502<br>510-512<br>514-516<br>524-526<br>534-536<br>544-546<br>552-554<br>560-562<br>564-566<br>572-574<br>580-582<br>584-586<br>590-592<br>594-596<br>598-600<br>602-604<br>606-608<br>610-612<br>614-616<br>618-620<br>622-624<br>626-628<br>630-632<br>634-636<br>638-640<br>642-644<br>646-648<br>650-652<br>654-656<br>658-660<br>662-664<br>666-668<br>670-672<br>674-676<br>678-680<br>682-684<br>686-688<br>690-692<br>694-696<br>698-700<br>702-704<br>706-708<br>710-712<br>714-716<br>718-720<br>722-724<br>726-728<br>730-732<br>734-736<br>738-740<br>742-744<br>746-748<br>750-752<br>754-756<br>758-760<br>762-764<br>766-768<br>770-772<br>774-776<br>778-780<br>782-784<br>786-788<br>790-792<br>794-796<br>798-800<br>802-804<br>806-808<br>810-812<br>814-816<br>818-820<br>822-824<br>826-828<br>830-832<br>834-836<br>838-840<br>842-844<br>846-848<br>850-852<br>854-856<br>858-860<br>862-864<br>866-868<br>870-872<br>874-876<br>878-880<br>882-884<br>886-888<br>890-892<br>894-896<br>898-900<br>902-904<br>906-908<br>910-912<br>914-916<br>918-920<br>922-924<br>926-928<br>930-932<br>934-936<br>938-940<br>942-944<br>946-948<br>950-952<br>954-956<br>958-960<br>962-964<br>966-968<br>970-972<br>974-976<br>978-980<br>982-984<br>986-988<br>990-992<br>994-996<br>998-1000<br>1002-1004<br>1006-1008<br>1010-1012<br>1014-1016<br>1018-1020<br>1022-1024<br>1026-1028<br>1030-1032<br>1034-1036<br>1038-1040<br>1042-1044<br>1046-1048<br>1050-1052<br>1054-1056<br>1058-1060<br>1062-1064<br>1066-1068<br>1070-1072<br>1074-1076<br>1078-1080<br>1082-1084<br>1086-1088<br>1090-1092<br>1094-1096<br>1098-1100<br>1102-1104<br>1106-1108<br>1110-1112<br>1114-1116<br>1118-1120<br>1122-1124<br>1126-1128<br>1130-1132<br>1134-1136<br>1138-1140<br>1142-1144<br>1146-1148<br>1150-1152<br>1154-1156<br>1158-1160<br>1162-1164<br>1166-1168<br>1170-1172<br>1174-1176<br>1178-1180<br>1182-1184<br>1186-1188<br>1190-1192<br>1194-1196<br>1198-1200<br>1202-1204<br>1206-1208<br>1210-1212<br>1214-1216<br>1218-1220<br>1222-1224<br>1226-1228<br>1230-1232<br>1234-1236<br>1238-1240<br>1242-1244<br>1246-1248<br>1250-1252<br>1254-1256<br>1258-1260<br>1262-1264<br>1266-1268<br>1270-1272<br>1274-1276<br>1278-1280<br>1282-1284<br>1286-1288<br>1290-1292<br>1294-1296<br>1298-1300<br>1302-1304<br>1306-1308<br>1310-1312<br>1314-1316<br>1318-1320<br>1322-1324<br>1326-1328<br>1330-1332<br>1334-1336<br>1338-1340<br>1342-1344<br>1346-1348<br>1350-1352<br>1354-1356<br>1358-1360<br>1362-1364<br>1366-1368<br>1370-1372<br>1374-1376<br>1378-1380<br>1382-1384<br>1386-1388<br>1390-1392<br>1394-1396<br>1398-1400<br>1402-1404<br>1406-1408<br>1410-1412<br>1414-1416<br>1418-1420<br>1422-1424<br>1426-1428<br>1430-1432<br>1434-1436<br>1438-1440<br>1442-1444<br>1446-1448<br>1450-1452<br>1454-1456<br>1458-1460<br>1462-1464<br>1466-1468<br>1470-1472<br>1474-1476<br>1478-1480<br>1482-1484<br>1486-1488<br>1490-1492<br>1494-1496<br>1498-1500<br>1502-1504<br>1506-1508<br>1510-1512<br>1514-1516<br>1518-1520<br>1522-1524<br>1526-1528<br>1530-1532<br>1534-1536<br>1538-1540<br>1542-1544<br>1546-1548<br>1550-1552<br>1554-1556<br>1558-1560<br>1562-1564<br>1566-1568<br>1570-1572<br>1574-1576<br>1578-1580<br>1582-1584<br>1586-1588<br>1590-1592<br>1594-1596<br>1598-1600<br>1602-1604<br>1606-1608<br>1610-1612<br>1614-1616<br>1618-1620<br>1622-1624<br>1626-1628<br>1630-1632<br>1634-1636<br>1638-1640<br>1642-1644<br>1646-1648<br>1650-1652<br>1654-1656<br>1658-1660<br>1662-1664<br>1666-1668<br>1670-1672<br>1674-1676<br>1678-1680<br>1682-1684<br>1686-1688<br>1690-1692<br>1694-1696<br>1698-1700<br>1702-1704<br>1706-1708<br>1710-1712<br>1714-1716<br>1718-1720<br>1722-1724<br>1726-1728<br>1730-1732<br>1734-1736<br>1738-1740<br>1742-1744<br>1746-1748<br>1750-1752<br>1754-1756<br>1758-1760<br>1762-1764<br>1766-1768<br>1770-1772<br>1774-1776<br>1778-1780<br>1782-1784<br>1786-1788<br>1790-1792<br>1794-1796<br>1798-1800<br>1802-1804<br>1806-1808<br>1810-1812<br>1814-1816<br>1818-1820<br>1822-1824<br>1826-1828<br>1830-1832<br>1834-1836<br>1838-1840<br>1842-1844<br>1846-1848<br>1850-1852<br>1854-1856<br>1858-1860<br>1862-1864<br>1866-1868<br>1870-1872<br>1874-1876<br>1878-1880<br>1882-1884<br>1886-1888<br>1890-1892<br>1894-1896<br>1898-1900<br>1902-1904<br>1906-1908<br>1910-1912<br>1914-1916<br>1918-1920<br>1922-1924<br>1926-1928<br>1930-1932<br>1934-1936<br>1938-1940<br>1942-1944<br>1946-1948<br>1950-1952<br>1954-1956<br>1958-1960<br>1962-1964<br>1966-1968<br>1970-1972<br>1974-1976<br>1978-1980<br>1982-1984<br>1986-1988<br>1990-1992<br>1994-1996<br>1998-2000<br>2002-2004<br>2006-2008<br>2010-2012<br>2014-2016<br>2018-2020<br>2022-2024<br>2026-2028<br>2030-2032<br>2034-2036<br>2038-2040<br>2042-2044<br>2046-2048<br>2050-2052<br>2054-2056<br>2058-2060<br>2062-2064<br>2066-2068<br>2070-2072<br>2074-2076<br>2078-2080<br>2082-2084<br>2086-2088<br>2090-2092<br>2094-2096<br>2098-2100<br>2102-2104<br>2106-2108<br>2110-2112<br>2114-2116<br>2118-2120<br>2122-2124<br>2126-2128<br>2130-2132<br>2134-2136<br>2138-2140<br>2142-2144<br>2146-2148<br>2150-2152<br>2154-2156<br>2158-2160<br>2162-2164<br>2166-2168<br>2170-2172<br>2174-2176<br>2178-2180<br>2182-2184<br>2186-2188<br>2190-2192<br>2194-2196<br>2198-2200<br>2202-2204<br>2206-2208<br>2210-2212<br>2214-2216<br>2218-2220                                                                                                                                                                                                                                                                                                                                                                                                                                                                                                                                                                                                                                                                                                                                                                                                                                                                                                                                                                                                                                                                                                                                                                                                                                                                                                                                                                                                                                                                                                                                                                                                                                                                                                                                                                                                                                                                                                                                                                                                                                                                                                                                                                                                                                                                                                                                                                                                                                                                                                                                                                                                                                                                                                                                                                                                                                                                                                                                                                                                                                                                                                                                                                                                                                                                                                                                                                                                                                                                                                                                                                                                                                                                                                                                                                                                                        |
|          | DNMT2   | comp216256_c0<br>Hsnp DNMT2<br>136-138<br>216-218<br>280-282<br>342-344<br>404-406<br>466-468<br>528-530<br>590-592<br>652-654<br>714-716<br>776-778<br>838-840<br>900-902<br>962-964<br>1024-1026<br>1086-1088<br>1148-1150<br>1210-1212<br>1272-1274<br>1334-1336<br>1396-1398<br>1458-1460<br>1520-1522<br>1582-1584<br>1644-1646<br>1706-1708<br>1768-1770<br>1830-1832<br>1892-1894<br>1954-1956<br>2016-2018<br>2078-2080<br>2140-2142<br>2202-2204<br>2264-2266<br>2326-2328<br>2388-2390<br>2450-2452<br>2512-2514<br>2574-2576<br>2636-2638<br>2698-2700<br>2760-2762<br>2822-2824<br>2884-2886<br>2946-2948<br>3008-3010<br>3070-3072<br>3132-3134<br>3194-3196<br>3256-3258<br>3318-3320<br>3380-3382<br>3442-3444<br>3504-3506<br>3566-3568<br>3628-3630<br>3690-3692<br>3752-3754<br>3814-3816<br>3876-3878<br>3938-3940<br>4000-4002<br>4062-4064<br>4124-4126<br>4186-4188<br>4248-4250<br>4310-4312<br>4372-4374<br>4434-4436<br>4496-4498<br>4558-4560<br>4620-4622<br>4682-4684<br>4744-4746<br>4806-4808<br>4868-4870<br>4930-4932<br>4992-4994<br>5054-5056<br>5116-5118<br>5178-5180<br>5240-5242<br>5302-5304<br>5364-5366<br>5426-5428<br>5488-5490<br>5550-5552<br>5612-5614<br>5674-5676<br>5736-5738<br>5798-5800<br>5860-5862<br>5922-5924<br>5984-5986<br>6046-6048<br>6108-6110<br>6170-6172<br>6232-6234<br>6294-6296<br>6356-6358<br>6418-6420<br>6480-6482<br>6542-6544<br>6604-6606<br>6666-6668<br>6728-6730<br>6790-6792<br>6852-6854<br>6914-6916<br>6976-6978<br>7038-7040<br>7100-7102<br>7162-7164<br>7224-7226<br>7286-7288<br>7348-7350<br>7410-7412<br>7472-7474<br>7534-7536<br>7596-7598<br>7658-7660<br>7720-7722<br>7782-7784<br>7844-7846<br>7906-7908<br>7968-7970<br>8030-8032<br>8092-8094<br>8154-8156<br>8216-8218<br>8278-8280<br>8340-8342<br>8402-8404<br>8464-8466<br>8526-8528<br>8588-8590<br>8650-8652<br>8712-8714<br>8774-8776<br>8836-8838<br>8898-8900<br>8960-8962<br>9022-9024<br>9084-9086<br>9146-9148<br>9208-9210<br>9270-9272<br>9332-9334<br>9394-9396<br>9456-9458<br>9518-9520<br>9580-9582<br>9642-9644<br>9704-9706<br>9766-9768<br>9828-9830<br>9890-9892<br>9952-9954<br>10014-10016<br>10076-10078<br>10138-10140<br>10200-10202<br>10262-10264<br>10324-10326<br>10386-10388<br>10448-10450<br>10510-10512<br>10572-10574<br>10634-10636<br>10696-10698<br>10758-10760<br>10820-10822<br>10882-10884<br>10944-10946<br>11006-11008<br>11068-11070<br>11130-11132<br>11192-11194<br>11254-11256<br>11316-11318<br>11378-11380<br>11440-11442<br>11502-11504<br>11564-11566<br>11626-11628<br>11688-11690<br>11750-11752<br>11812-11814<br>11874-11876<br>11936-11938<br>12000-12002<br>12062-12064<br>12124-12126<br>12186-12188<br>12248-12250<br>12310-12312<br>12372-12374<br>12434-12436<br>12496-12498<br>12558-12560<br>12620-12622<br>12682-12684<br>12744-12746<br>12806-12808<br>12868-12870<br>12930-12932<br>12992-12994<br>13054-13056<br>13116-13118<br>13178-13180<br>13240-13242<br>13302-13304<br>13364-13366<br>13426-13428<br>13488-13490<br>13550-13552<br>13612-13614<br>13674-13676<br>13736-13738<br>13798-13800<br>13860-13862<br>13922-13924<br>13984-13986<br>14046-14048<br>14108-14110<br>14170-14172<br>14232-14234<br>14294-14296<br>14356-14358<br>14418-14420<br>14480-14482<br>14542-14544<br>14604-14606<br>14666-14668<br>14728-14730<br>14790-14792<br>14852-14854<br>14914-14916<br>14976-14978<br>15038-15040<br>15100-15102<br>15162-15164<br>15224-15226<br>15286-15288<br>15348-15350<br>15410-15412<br>15472-15474<br>15534-15536<br>15596-15598<br>15658-15660<br>15720-15722<br>15782-15784<br>15844-15846<br>15906-15908<br>15968-15970<br>16030-16032<br>16092-16094<br>16154-16156<br>16216-16218<br>16278-16280<br>16340-16342<br>16402-16404<br>16464-16466<br>16526-16528<br>16588-16590<br>16650-16652<br>16712-16714<br>16774-16776<br>16836-16838<br>16898-16900<br>16960-16962<br>17022-17024<br>17084-17086<br>17146-17148<br>17208-17210<br>17270-17272<br>17332-17334<br>17394-17396<br>17456-17458<br>17518-17520<br>17580-17582<br>17642-17644<br>17704-17706<br>17766-17768<br>17828-17830<br>17890-17892<br>17952-17954<br>18014-18016<br>18076-18078<br>18138-18140<br>18200-18202<br>18262-18264<br>18324-18326<br>18386-18388<br>18448-18450<br>18510-18512<br>18572-18574<br>18634-18636<br>18696-18698<br>18758-18760<br>18820-18822<br>18882-18884<br>18944-18946<br>19006-19008<br>19068-19070<br>19130-19132<br>19192-19194<br>19254-19256<br>19316-19318<br>19378-19380<br>19440-19442<br>19502-19504<br>19564-19566<br>19626-19628<br>19688-19690<br>19750-19752<br>19812-19814<br>19874-19876<br>19936-19938<br>20000-20002<br>20062-20064<br>20124-20126<br>20186-20188<br>20248-20250<br>20310-20312<br>20372-20374<br>20434-20436<br>20496-20498<br>20558-20560<br>20620-20622<br>20682-20684<br>20744-20746<br>20806-20808<br>20868-20870<br>20930-20932<br>20992-20994<br>21054-21056<br>21116-21118<br>21178-21180<br>21240-21242<br>21302-21304<br>21364-21366<br>21426-21428<br>21488-21490<br>21550-21552<br>21612-21614<br>21674-21676<br>21736-21738<br>21798-21800<br>21860-21862<br>21922-21924<br>21984-21986<br>22046-22048<br>22108-22110<br>22170-22172<br>22232-22234<br>22294-22296<br>22356-22358<br>22418-22420<br>22480-22482<br>22542-22544<br>22604-22606<br>22666-22668<br>22728-22730<br>22790-22792<br>22852-22854<br>22914-22916<br>22976-22978<br>23038-23040<br>23100-23102<br>23162-23164<br>23224-23226<br>23286-23288<br>23348-23350<br>23410-23412<br>23472-23474<br>23534-23536<br>23596-23598<br>23658-23660<br>23720-23722<br>23782-23784<br>23844-23846<br>23906-23908<br>23968-23970<br>24030-24032<br>24092-24094<br>24154-24156<br>24216-24218<br>24278-24280<br>24340-24342<br>24402-24404<br>24464-24466<br>24526-24528<br>24588-24590<br>24650-24652<br>24712-24714<br>24774-24776<br>24836-24838<br>24898-24900<br>24960-24962<br>25022-25024<br>25084-25086<br>25146-25148<br>25208-25210<br>25270-25272<br>25332-25334<br>25394-25396<br>25456-25458<br>25518-25520<br>25580-25582<br>25642-25644<br>25704-25706<br>25766-25768<br>25828-25830<br>25890-25892<br>25952-25954<br>26014-26016<br>26076-26078<br>26138-26140<br>26200-26202<br>26262-26264<br>26324-26326<br>26386-26388<br>26448-26450<br>26510-26512<br>26572-26574<br>26634-26636<br>26696-26698<br>26758-26760<br>26820-26822<br>26882-26884<br>26944-26946<br>27006-27008<br>27068-27070<br>27130-27132<br>27192-27194<br>27254-27256<br>27316-27318<br>27378-27380<br>27440-27442<br>27502-27504<br>27564-27566<br>27626-27628<br>27688-27690<br>27750-27752<br>27812-27814<br>27874-27876<br>27936-27938<br>28000-28002<br>28062-28064<br>28124-28126<br>28186-28188<br>28248-28250<br>28310-28312<br>28372-28374<br>28434-28436<br>28496-28498<br>28558-28560<br>28620-28622<br>28682-28684<br>28744-28746<br>28806-28808<br>28868-28870<br>28930-28932<br>28992-28994<br>29054-29056<br>29116-29118<br>29178-29180<br>29240-29242<br>29302-29304<br>29364-29366<br>29426-29428<br>29488-29490<br>29550-29552<br>29612-29614<br>29674-29676<br>29736-29738<br>29798-29800<br>29860-29862<br>29922-29924<br>29984-29986<br>30046-30048<br>30108-30110<br>30170-30172<br>30232-30234<br>30294-30296<br>30356-30358<br>30418-30420<br>30480-30482<br>30542-30544<br>30604-30606<br>30666-30668<br>30728-30730<br>30790-30792<br>30852-30854<br>30914-30916<br>30976-30978<br>31038-31040<br>31100-31102<br>31162-31164<br>31224-31226<br>31286-31288<br>31348-31350<br>31410-31412<br>31472-31474<br>31534-31536<br>31596-31598<br>31658-31660<br>31720-31722<br>31782-31784<br>31844-31846<br>31906-31908<br>31968-31970<br>32030-32032<br>32092-32094<br>32154-32156<br>32216-32218<br>32278-32280<br>32340-32342<br>32402-32404<br>32464-32466<br>32526-32528<br>32588-32590<br>32650-32652<br>32712-32714<br>32774-32776<br>32836-32838<br>32898-32900<br>32960-32962<br>33022-33024<br>33084-33086<br>33146-33148<br>33208-33210<br>33270-33272<br>33332-33334<br>33394-33396<br>33456-33458<br>33518-33520<br>33580-33582<br>33642-33644<br>33704-33706<br>33766-33768<br>33828-33830<br>33890-33892<br>33952-33954<br>34014-34016<br>34076-34078<br>34138-34140<br>34200-34202<br>34262-34264<br>34324-34326<br>34386-34388<br>34448-34450<br>34510-34512<br>34572-34574<br>34634-34636<br>34696-34698<br>34758-34760<br>34820-34822<br>34882-34884<br>34944-34946<br>35006-35008<br>35068-35070<br>35130-35132<br>35192-35194<br>35254-35256<br>35316-35318<br>35378-35380<br>35440-35442<br>35502-35504<br>35564-35566<br>35626-35628<br>35688-35690<br>35750-35752<br>35812-35814<br>35874-35876<br>35936-35938<br>36000-36002<br>36062-36064<br>36124-36126<br>36186-36188<br>36248-36250<br>36310-36312<br>36372-36374<br>36434-36436<br>36496-36498<br>36558-36560<br>36620-36622<br>36682-36684<br>36744-36746<br>36806-36808<br>36868-36870<br>36930-36932<br>36992-36994<br>37054-37056<br>37116-37118<br>37178-37180<br>37240-37242<br>37302-37304<br>37364-37366<br>37426-37428<br>37488-37490<br>37550-37552<br>37612-37614<br>37674-37676<br>37736-37738<br>37798-37800<br>37860-37862<br>37922-37924<br>37984-37986<br>38046-38048<br>38108-38110<br>38170-38172<br>38232-38234<br>38294-38296<br>38356-38358<br>38418-38420<br>38480-38482<br>38542-38544<br>38604-386 |
