# Supplementary material for: DNA methylation atlas and machinery in the developing and regenerating annelid Platynereis dumerilii
Source: PubMed Central journal article supplement (PMC8330077; doi:10.1186/s12915-021-01074-5), 2021-08-03

# A. DNMT Proteins

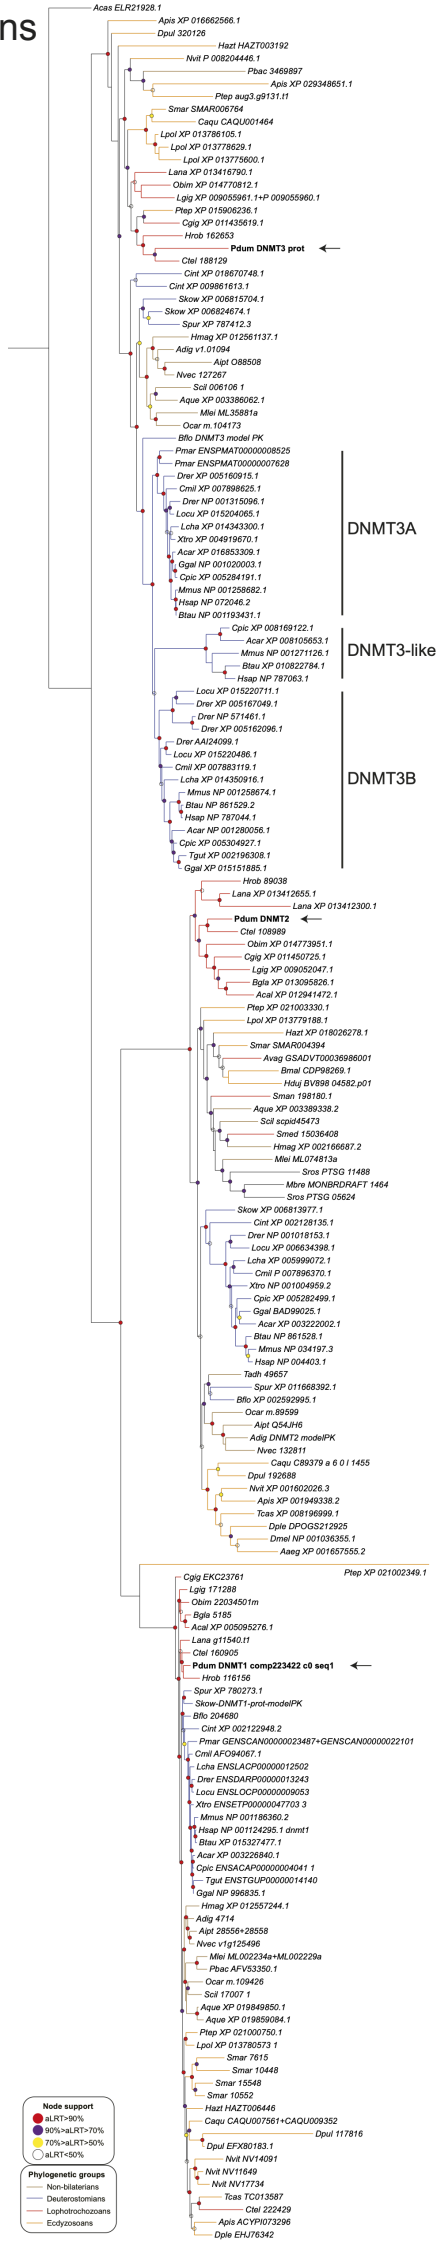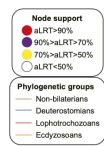

DNMT3

DNMT3A

DNMT3-like

DNMT3B

DNMT2

DNMT1

## B. TET Proteins

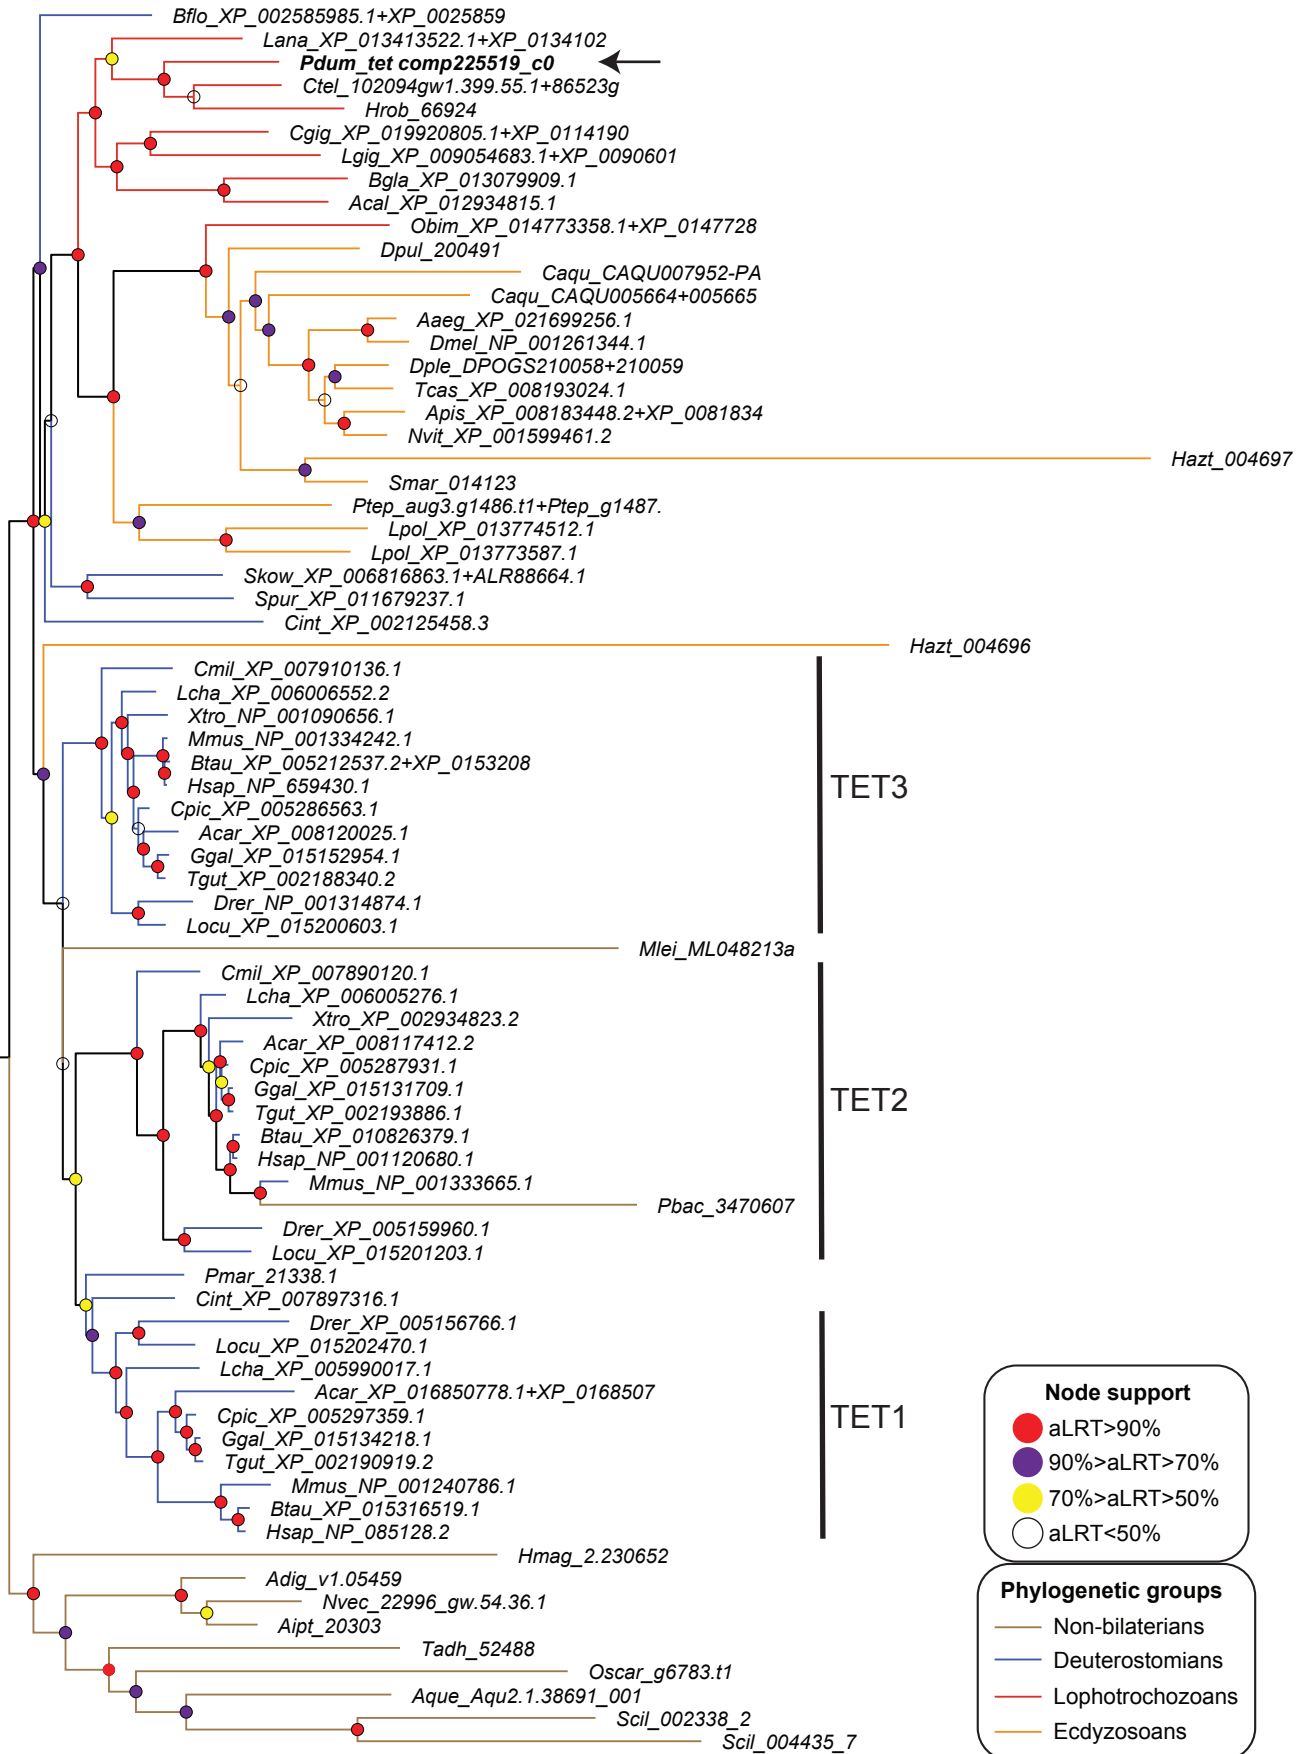

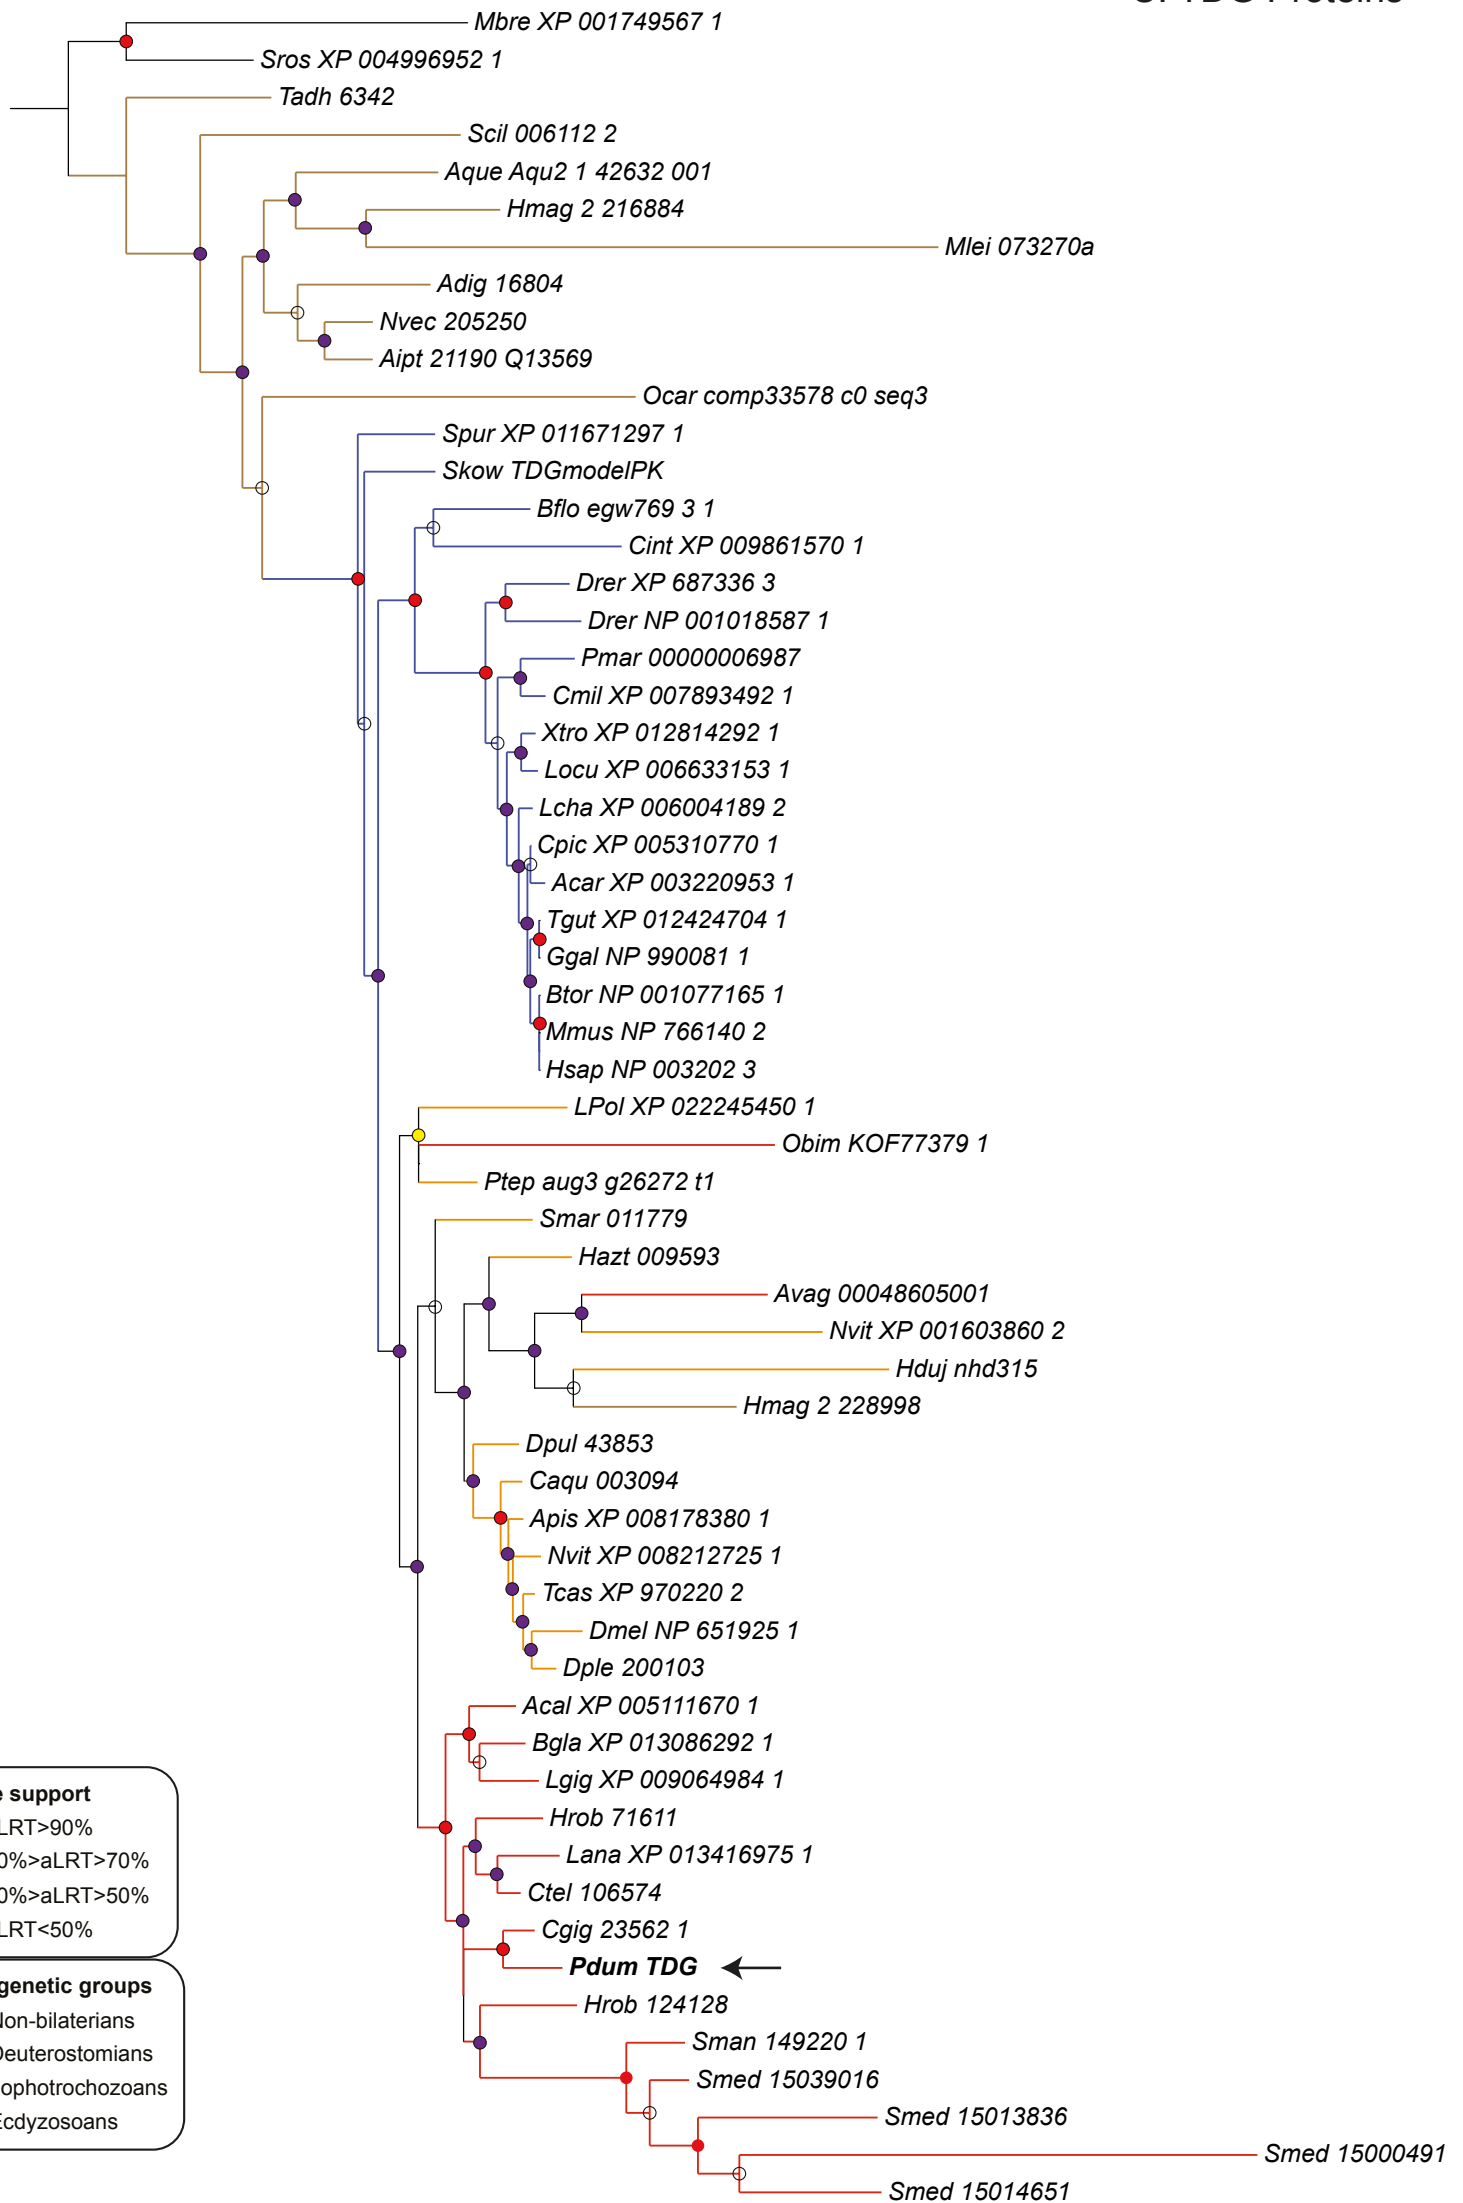

# D. UHRF Proteins

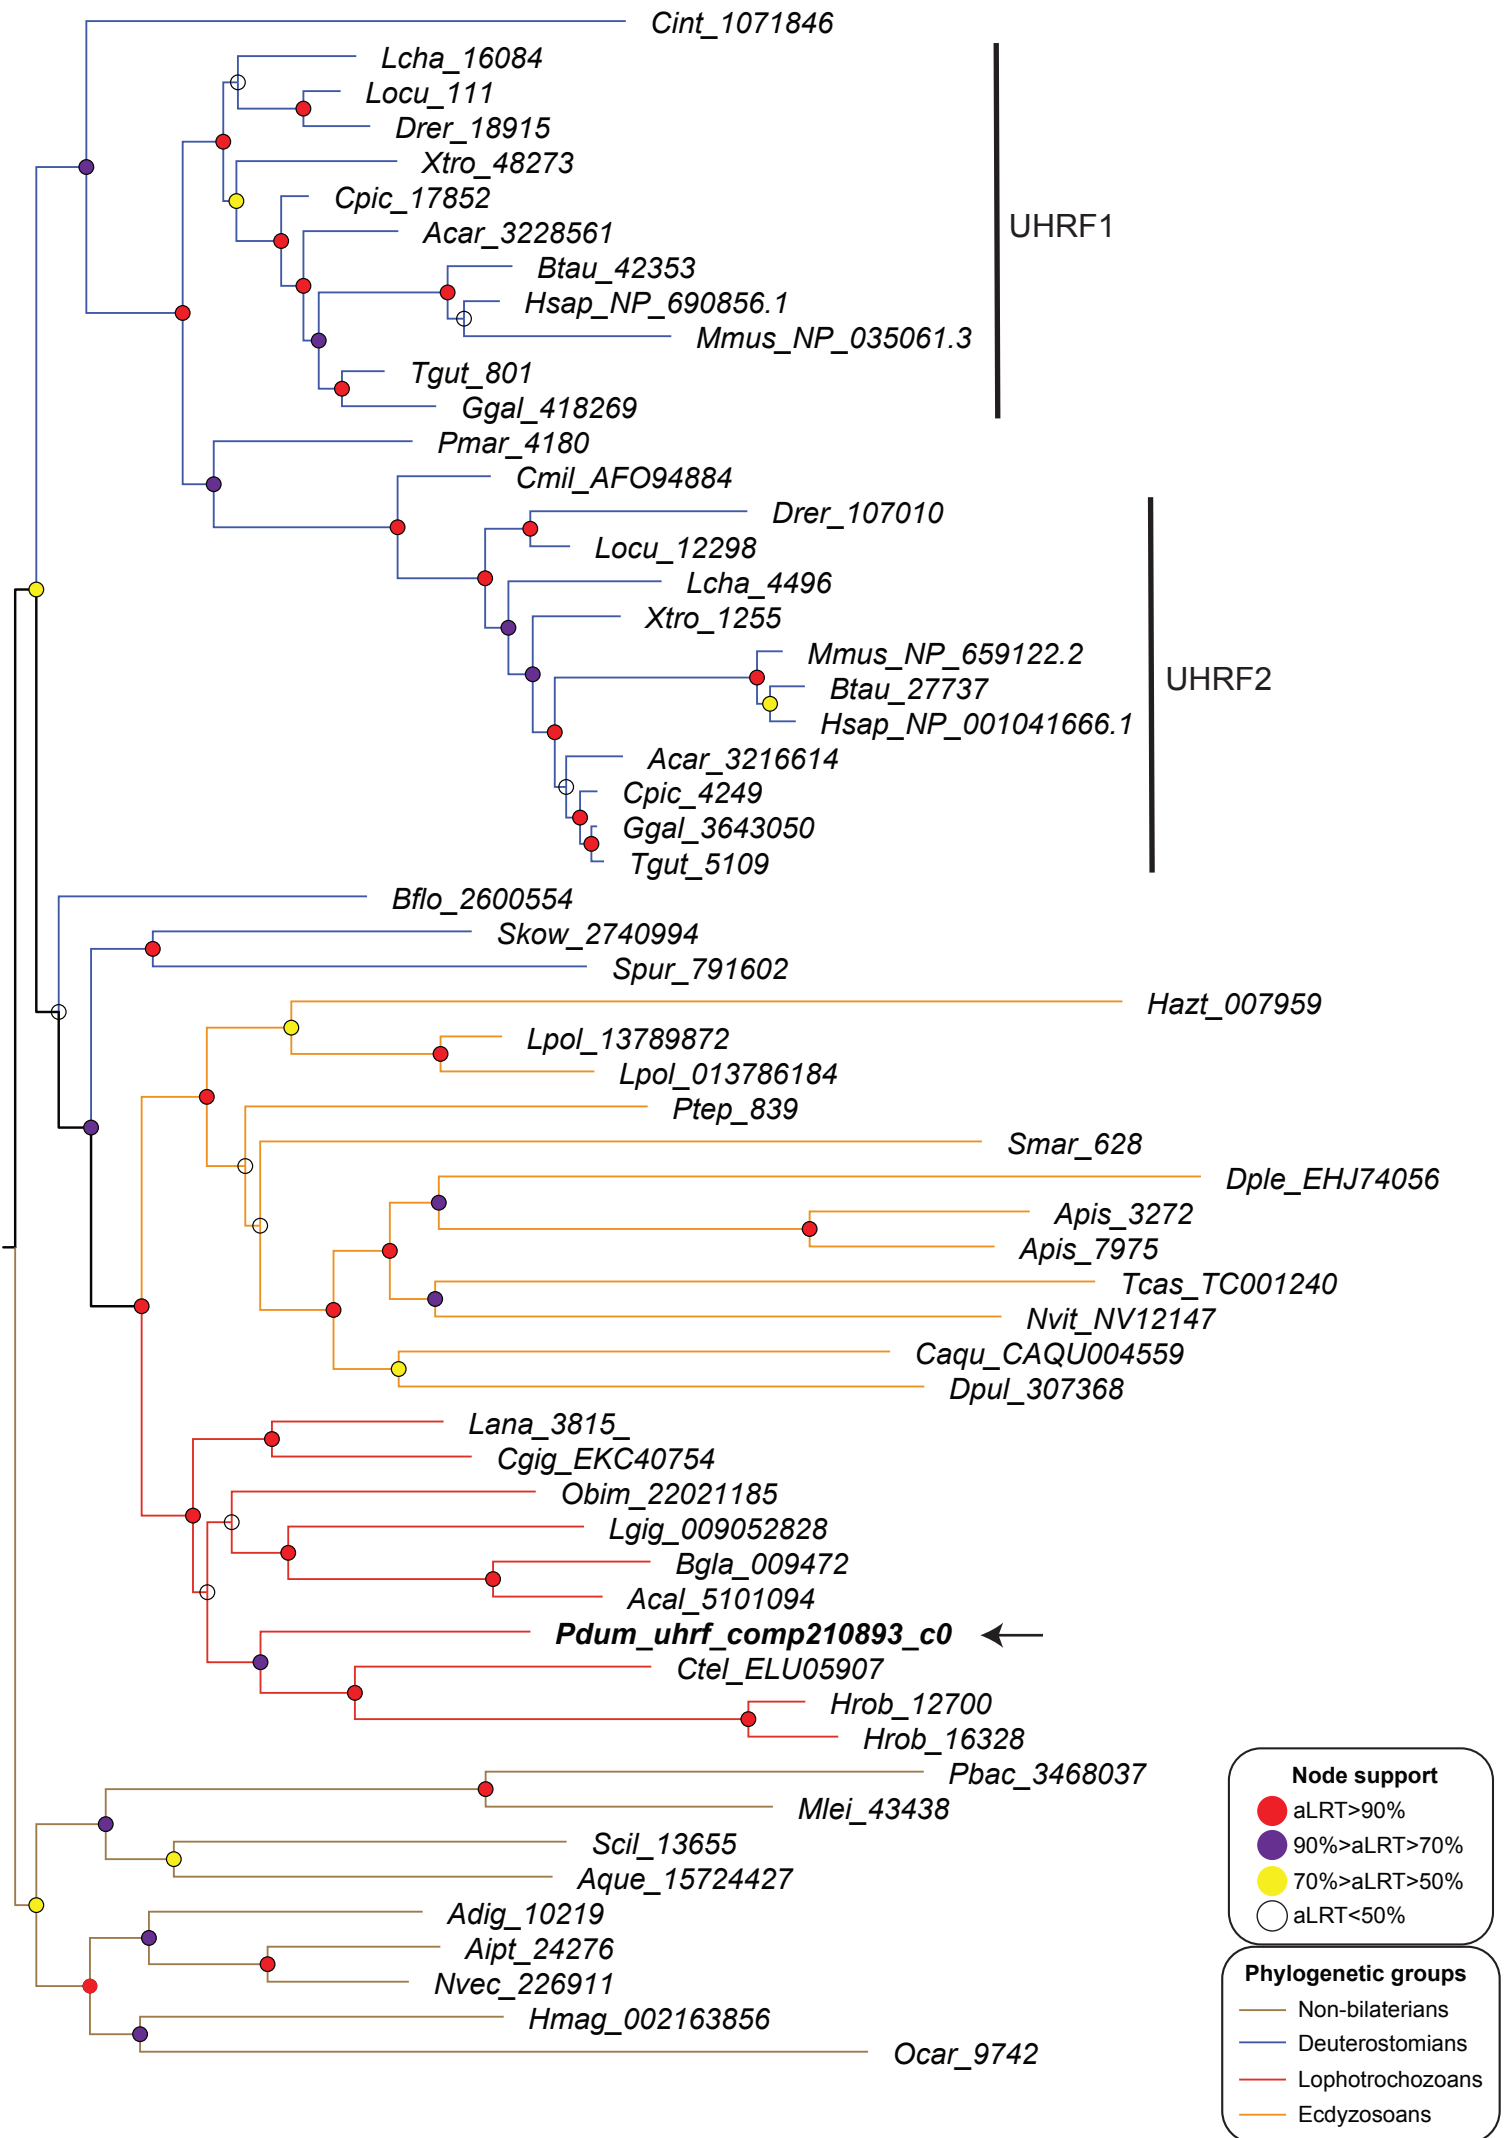

E. MBD Proteins

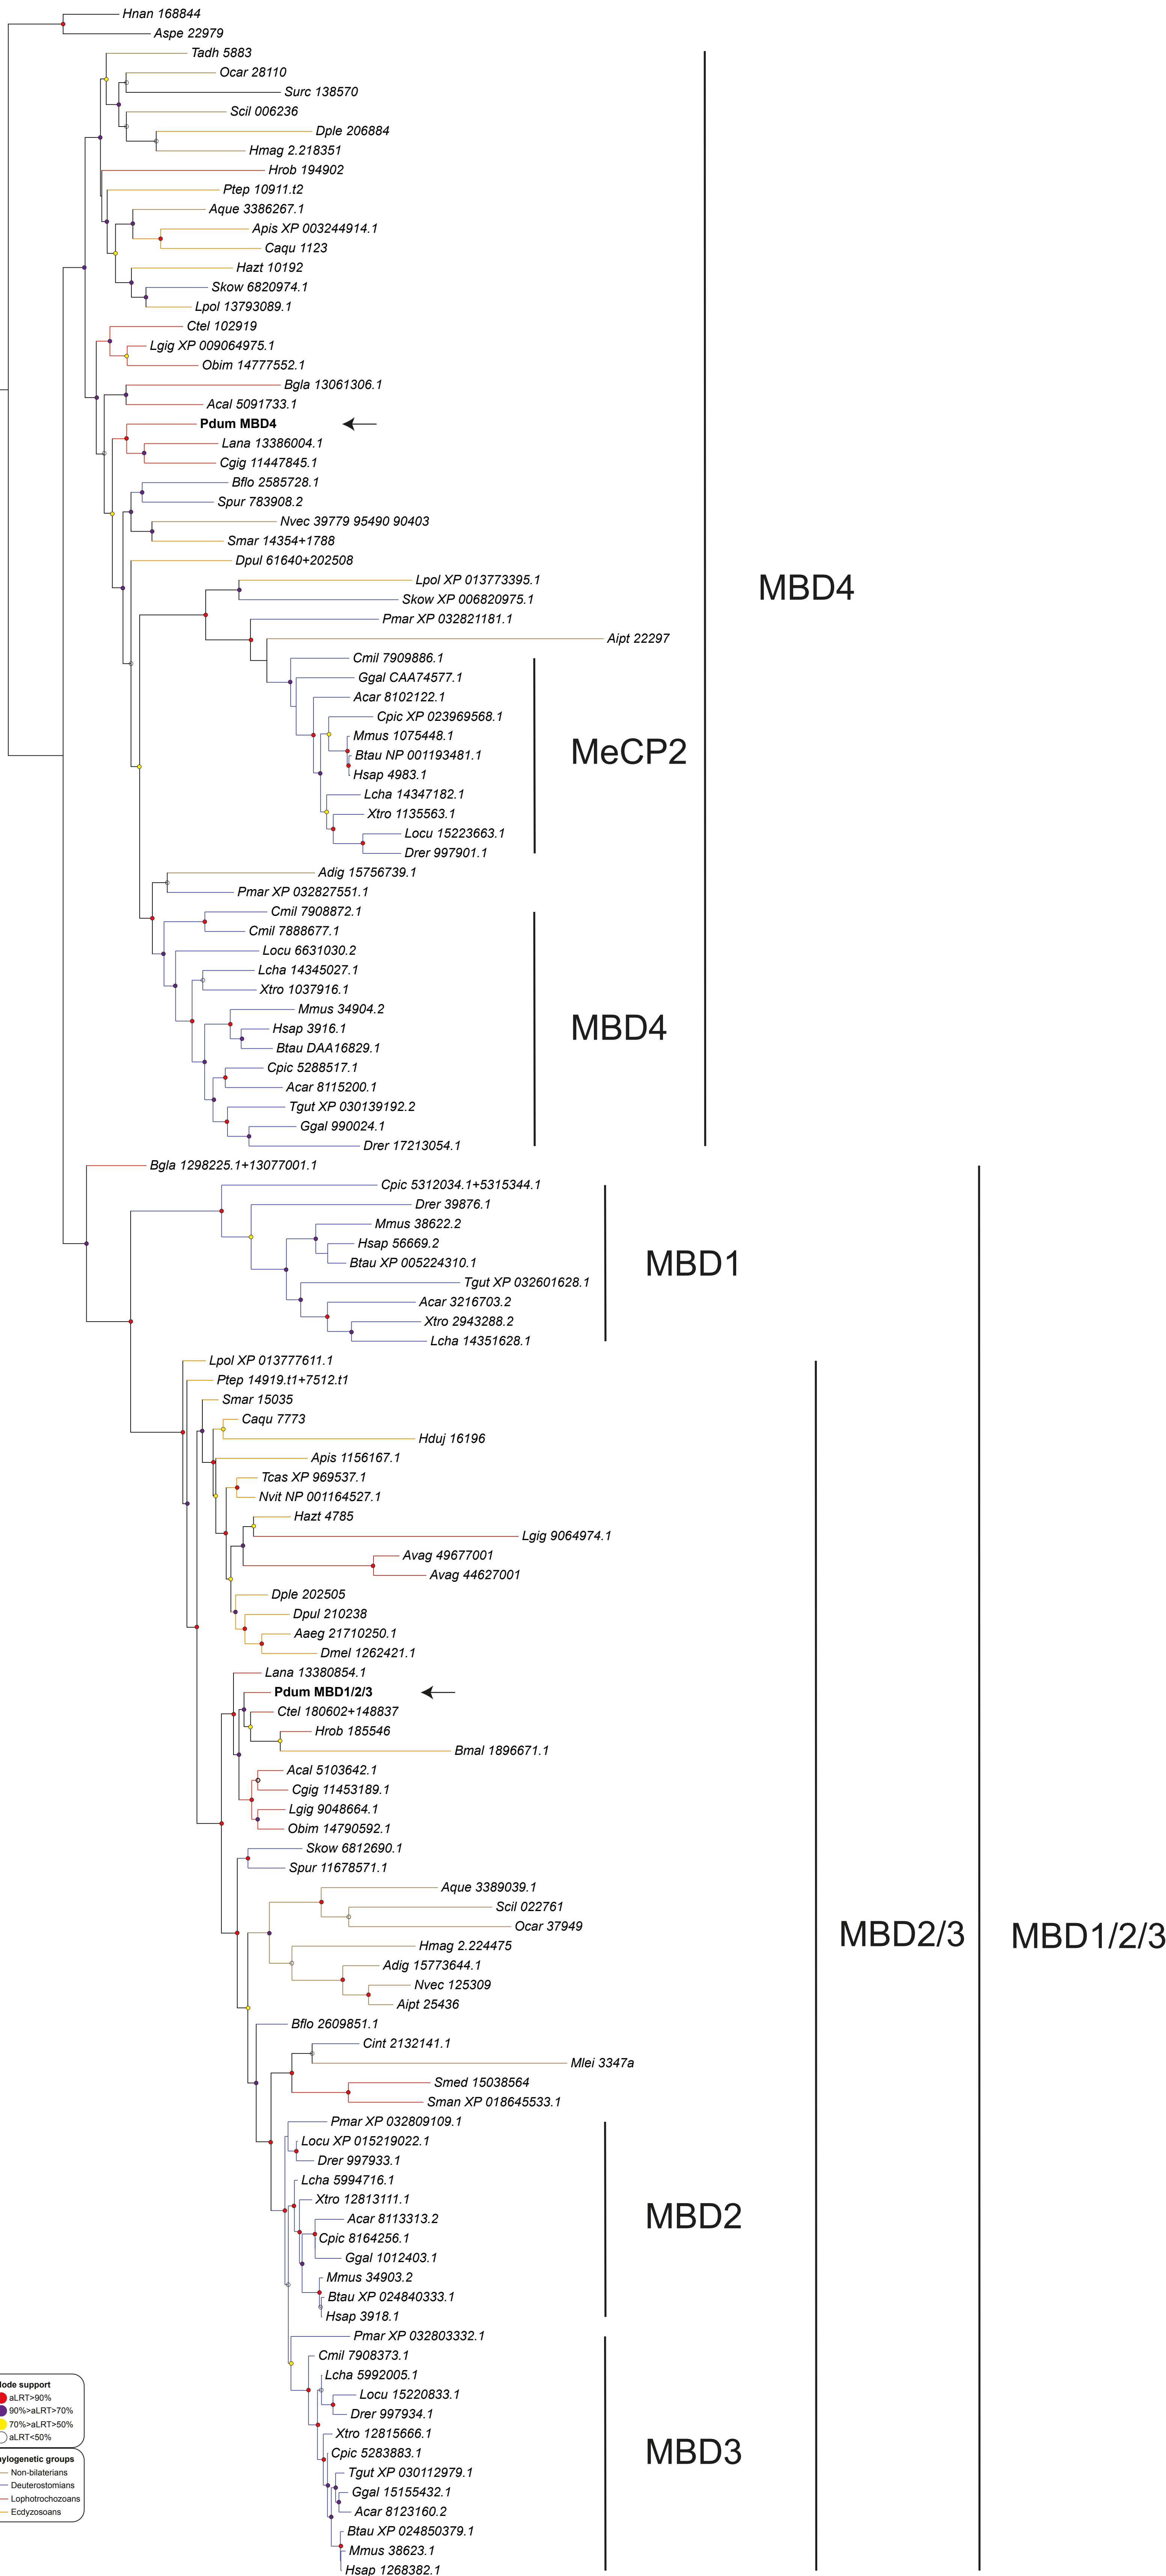

F. CHD Proteins

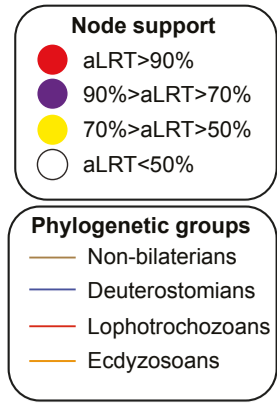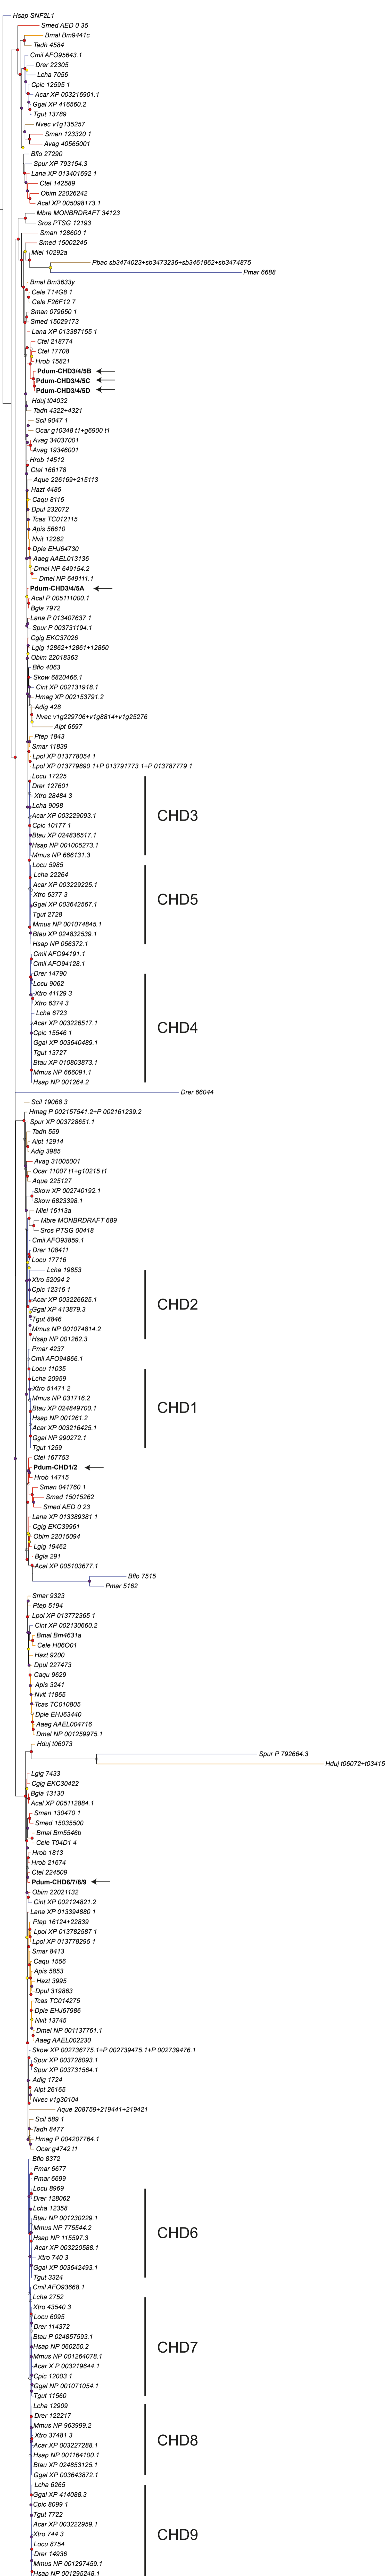

CHD3/4/5

CHD1/2

CHD6/7/8/9

G. HDAC Proteins

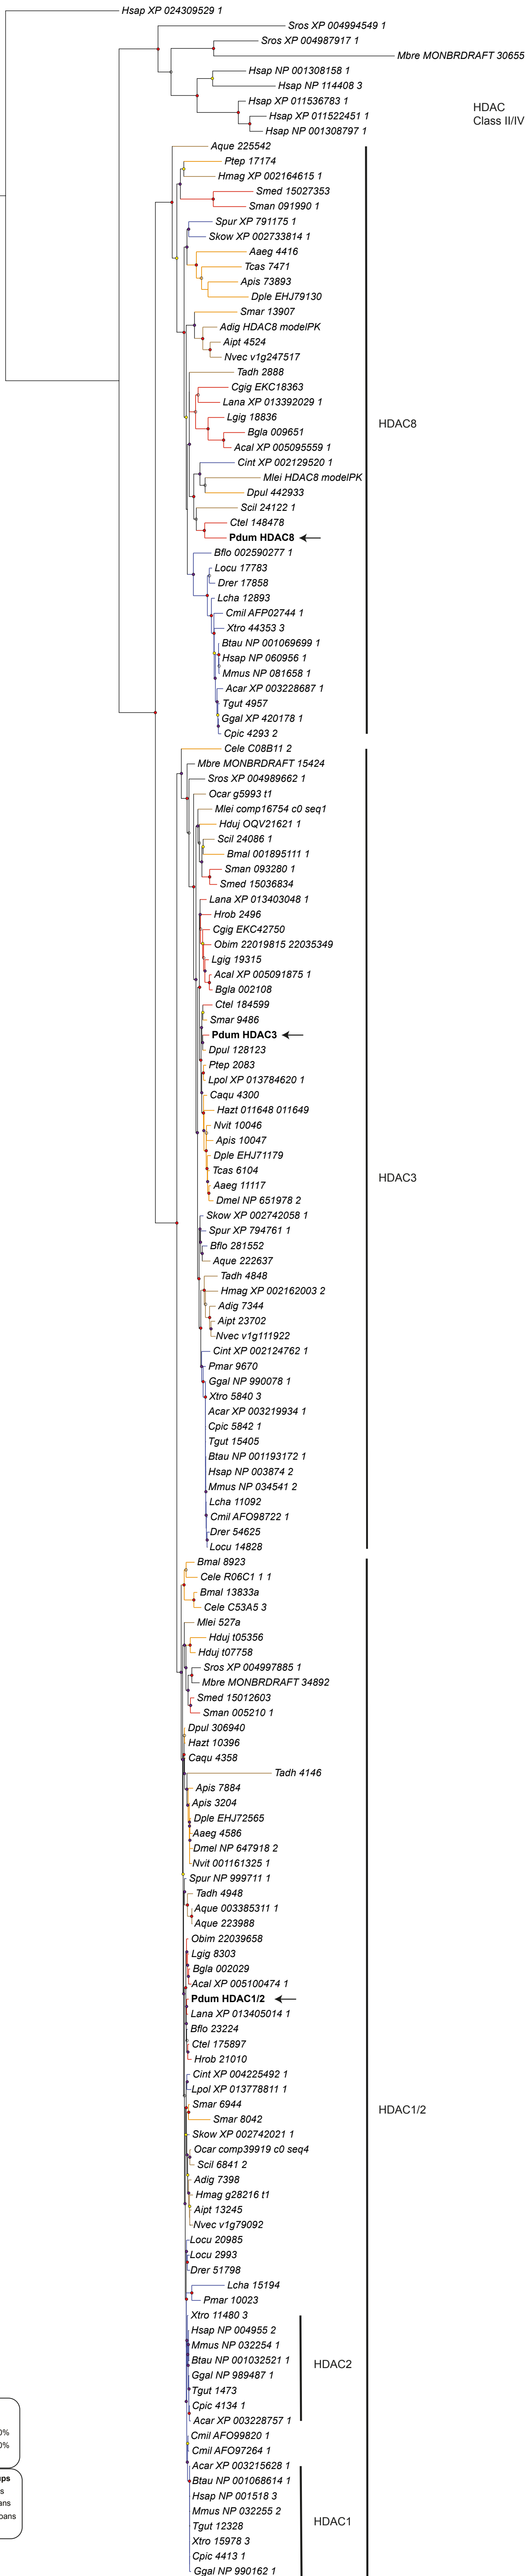

**Node support**

- aLRT>90%
- 90%>aLRT>70%
- 70%>aLRT>50%
- aLRT<50%

**Phylogenetic groups**

- Non-bilaterians
- Deuterostomians
- Lophotrochozoans
- Ecdysozoans

# H. RBBP4/7 Proteins

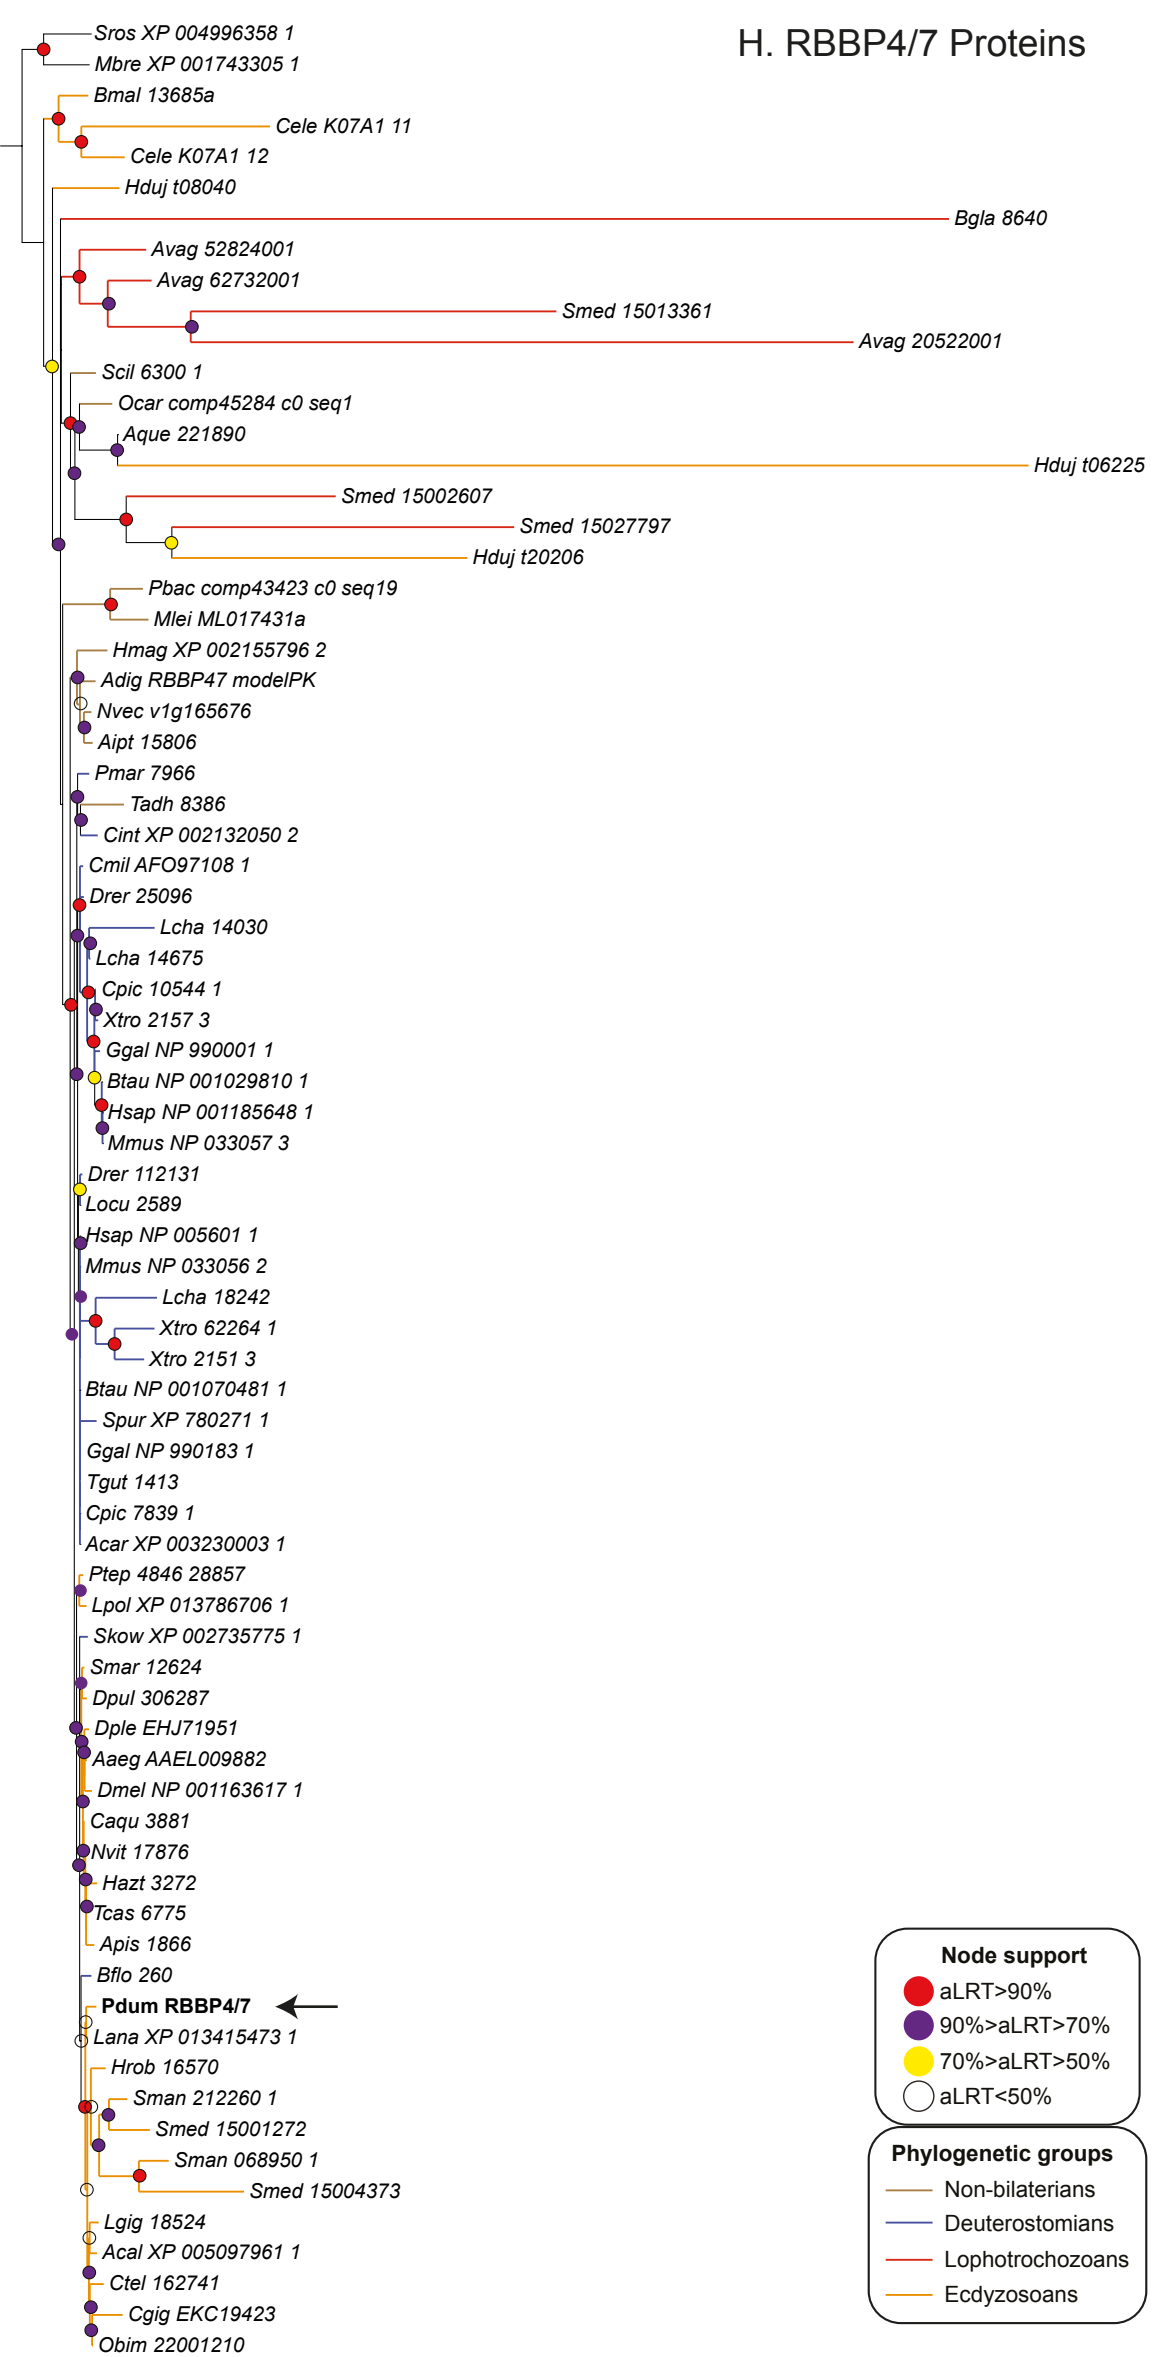



# I. MTA1/2/3 Proteins

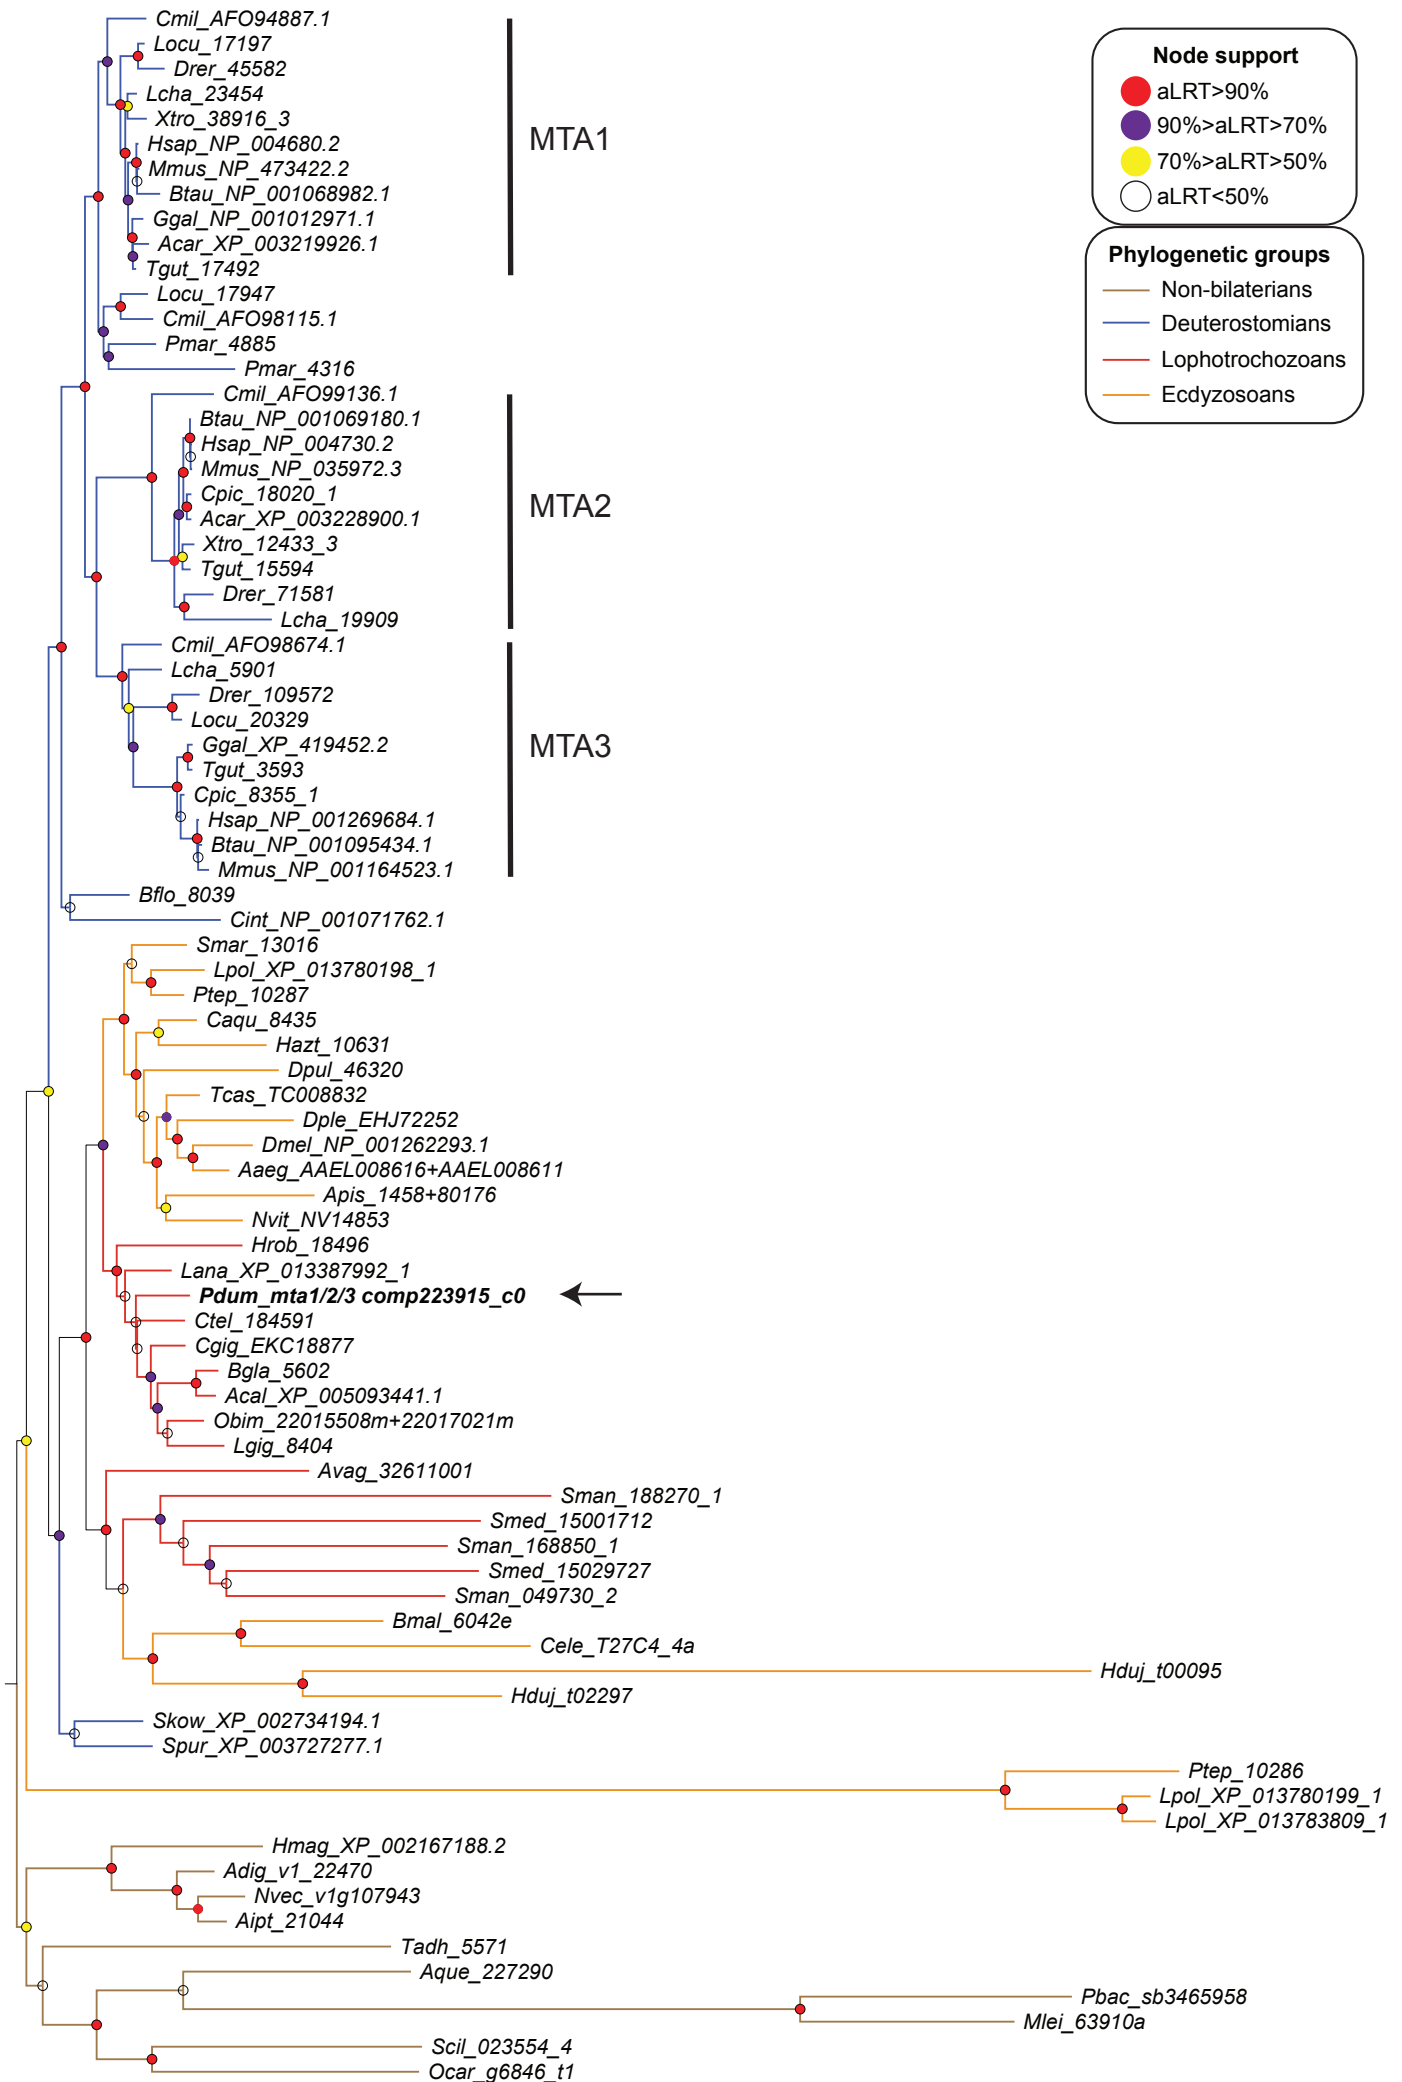

# J. GATAD2 Proteins

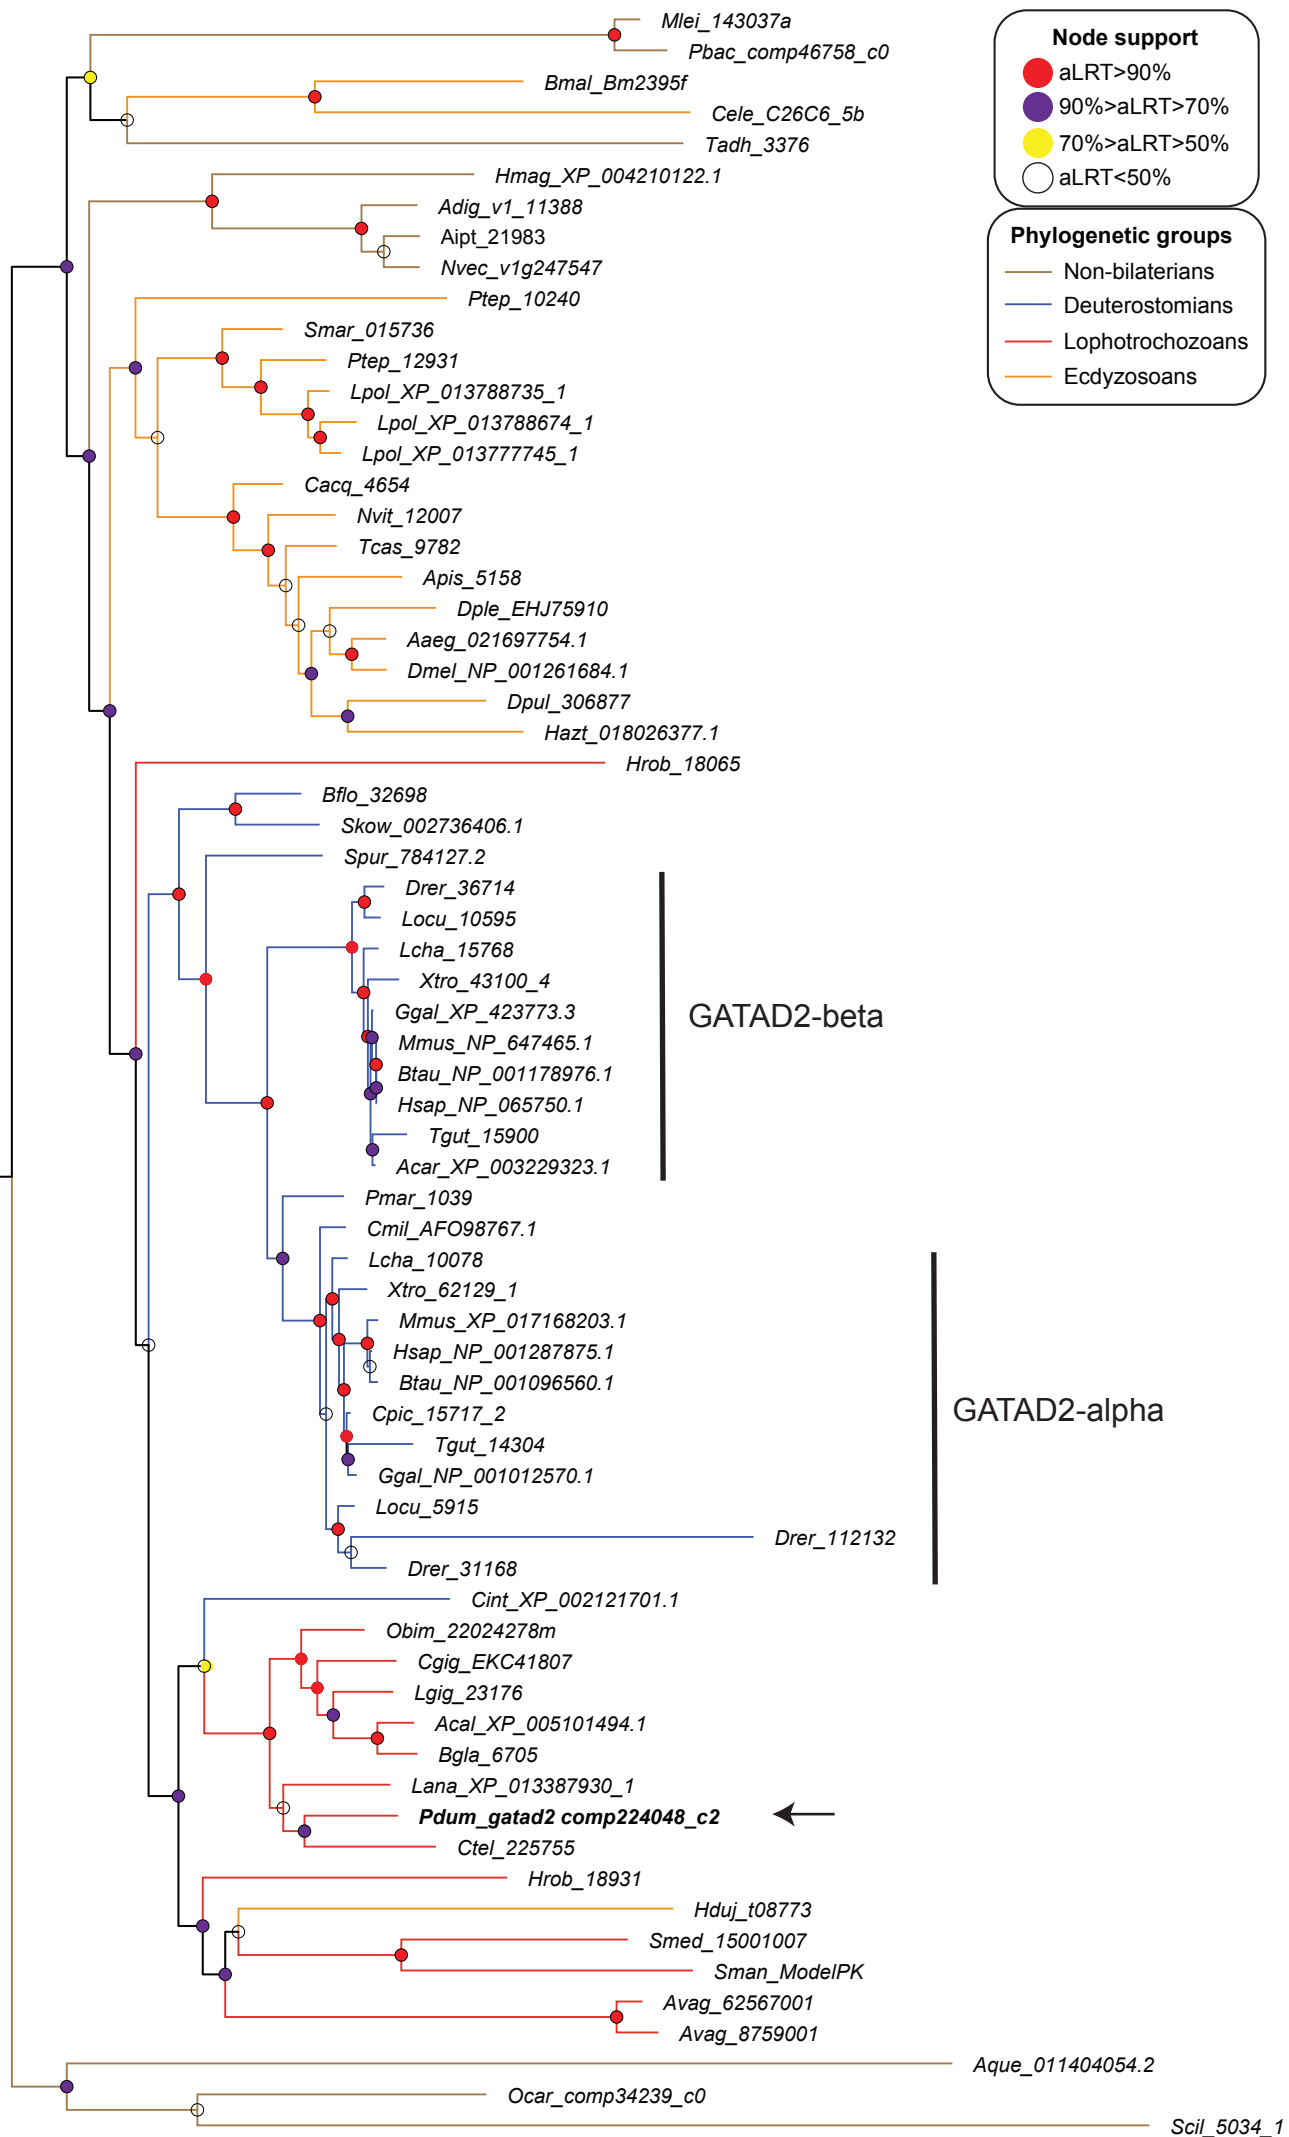

Supplement: 12915_2021_1074_MOESM6_ESM.pdf [file 12915_2021_1074_MOESM6_ESM.pdf]
