# Supplementary material for: DNA methylation atlas and machinery in the developing and regenerating annelid Platynereis dumerilii
Source: PubMed Central journal article supplement (PMC8330077; doi:10.1186/s12915-021-01074-5), 2021-08-03

Stage 5 - D

*Pdum-dnmt1*

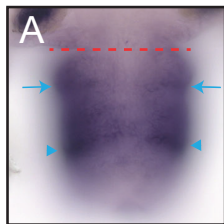

Stage 5 - D

*Pdum-tdg*

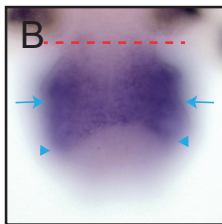

Stage 5 - D

*Pdum-hdac3*

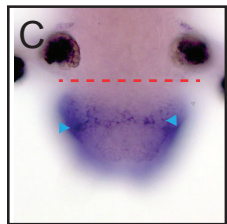

Stage 5 - D

*Pdum-hdac8*

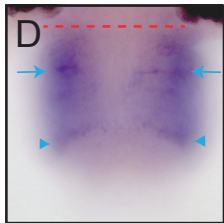

Stage 1 - P

*Pdum-chd3/4/5B*

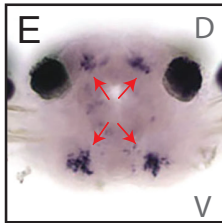

Stage 5 - D

*Pdum-chd1/2*

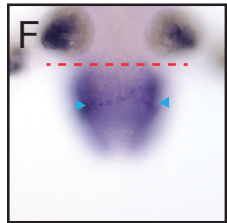

Supplement: 12915_2021_1074_MOESM9_ESM.pdf [file 12915_2021_1074_MOESM9_ESM.pdf]
