# Supplementary material for: DNA methylation atlas and machinery in the developing and regenerating annelid Platynereis dumerilii
Source: PubMed Central journal article supplement (PMC8330077; doi:10.1186/s12915-021-01074-5), 2021-08-03
Supplement: 12915_2021_1074_MOESM10_ESM.pdf [file 12915_2021_1074_MOESM10_ESM.pdf]

## Stage 1

## Stage 2

## Stage 3

## Stage 5

## Dorsal view

Entire wound epithelium

*dnmt1, dnmt3*

Lateral wound epithelium

*hdac3*

Lateral wound epithelium  
and lateral internal cells

*mbd1/2/3, hdac8*

Entire wound epithelium  
and internal cells

*chd1/2*

Entire wound epithelium  
and internal cells

*tdg, chd6/7/8/9*

Lateral internal cells

*chd3/4/5B*

Lateral ectoderm  
and lateral mesoderm

*dnmt1  
chd1/2, hdac3,  
hdac8*

Entire ectoderm  
and mesoderm

*dnmt3, tet, tdg  
mbd1/2/3, chd6/7/8/9*

Mesoderm

*chd3/4/5B*

Ectoderm, mesoderm  
and anal cirri

*dnmt1, dnmt3,  
tet, tdg  
mbd1/2/3,  
chd1/2, chd6/7/8/9,  
hdac3, hdac8*

Mesoderm

*chd3/4/5B*

Mesodermal growth zone,  
epithelium, lateral mesoderm  
and anal cirri

*dnmt1, tet,  
chd1/2, hdac8*

Ectoderm, lateral mesoderm  
and anal cirri

*hdac3*

Mesodermal growth zone,  
ectoderm, mesoderm  
and anal cirri

*dnmt3, tdg  
mbd1/2/3, chd6/7/8/9*

Mesodermal growth zone,  
and lateral mesoderm

*chd3/4/5B*

Ectodermal growth zone

*dnmt1, tdg  
chd1/2, chd6/7/8/9,  
hdac3, hdac8*

Tissue legend:

 Ectoderm

 Mesoderm

 Anal cirri
