# Supplementary material for: DNA methylation atlas and machinery in the developing and regenerating annelid Platynereis dumerilii
Source: PubMed Central journal article supplement (PMC8330077; doi:10.1186/s12915-021-01074-5), 2021-08-03

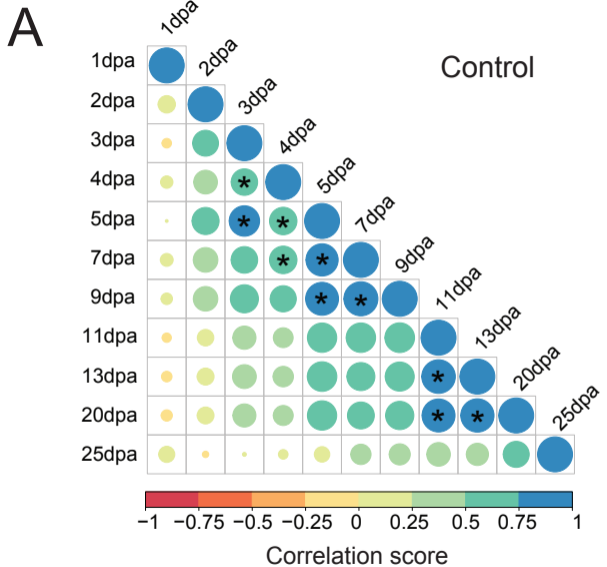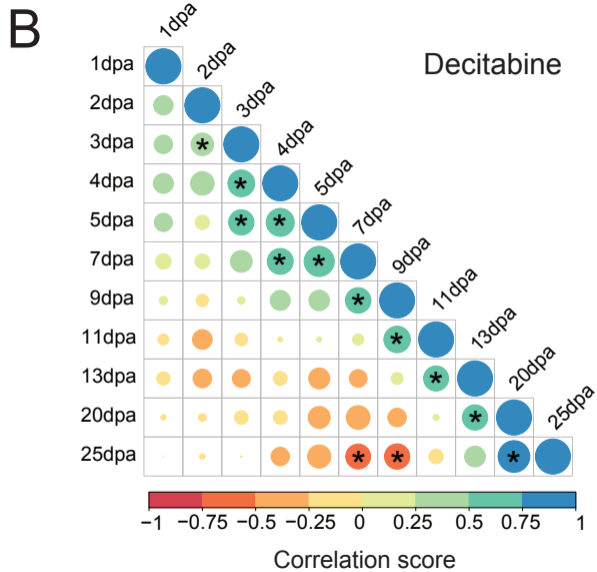

Supplement: 12915_2021_1074_MOESM15_ESM.pdf [file 12915_2021_1074_MOESM15_ESM.pdf]
